# Supplementary material for: Identification of DNA methylation patterns and biomarkers for clear-cell renal cell carcinoma by multi-omics data analysis
Source: PeerJ journal article supplement (doi:10.7717/peerj.9654), 2020-08-03
Supplement: Figure_S1.pdf [file Figure_S1.pdf]

**Methylation**

0.8  
0.6  
0.4  
0.2

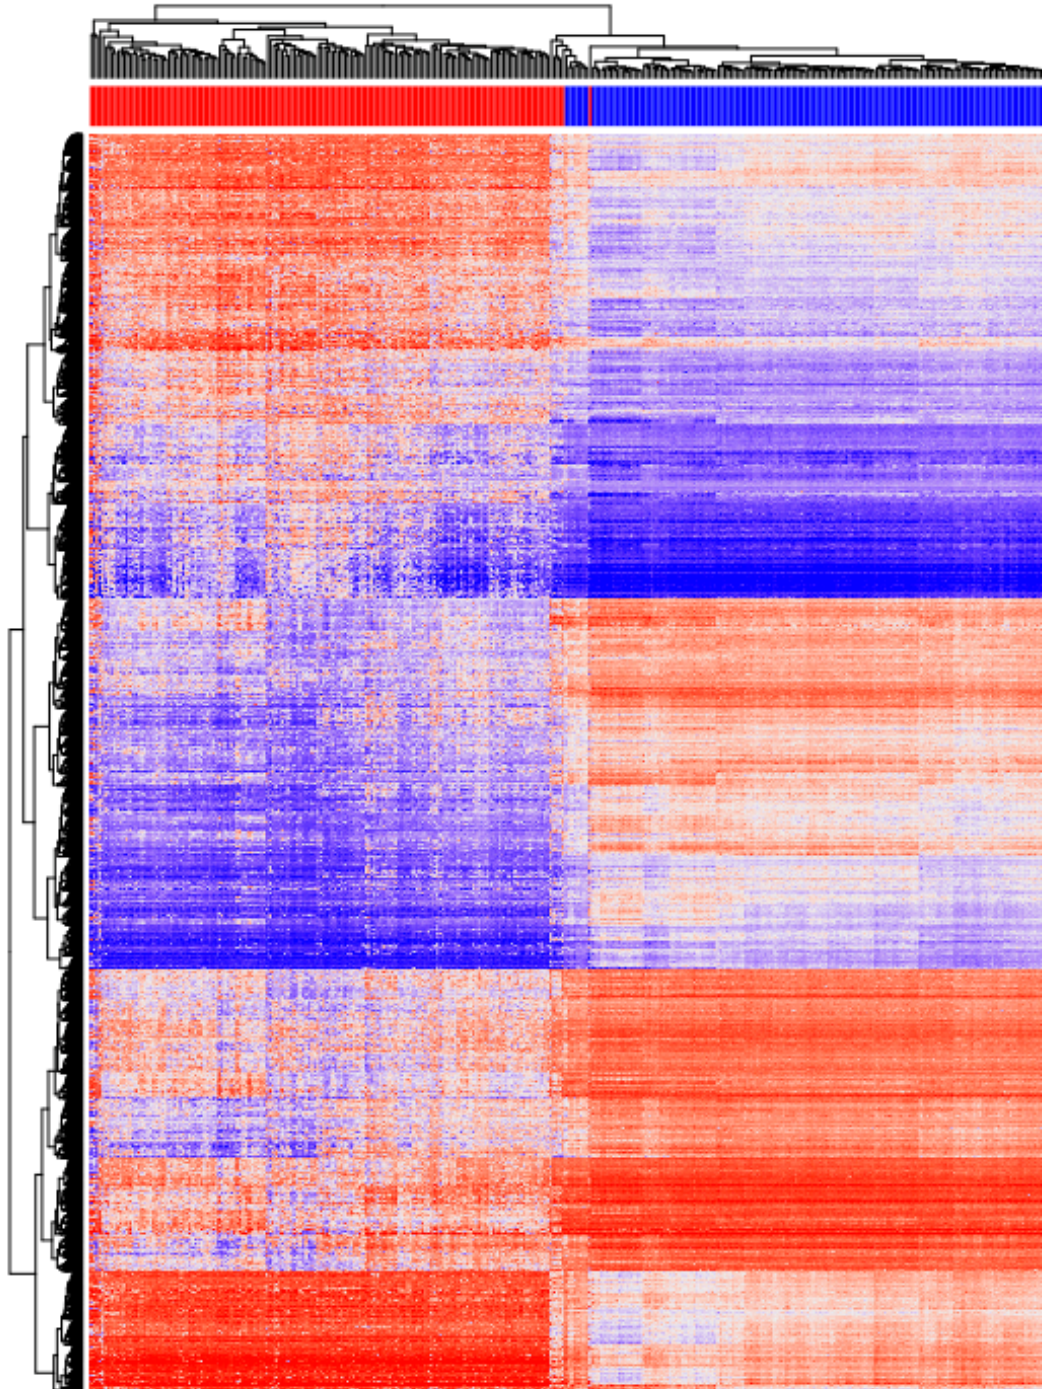

**Sample**

TUMOR  
NORMAL
