# Supplementary material for: Identification of DNA methylation patterns and biomarkers for clear-cell renal cell carcinoma by multi-omics data analysis
Source: PeerJ journal article supplement (doi:10.7717/peerj.9654), 2020-08-03

G01

Hypermethylation

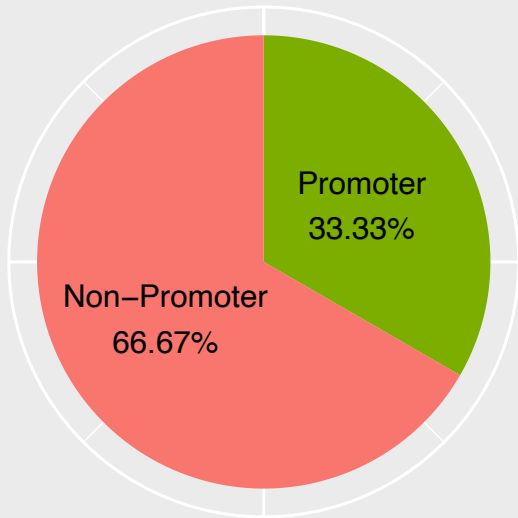

G01

Hypomethylation

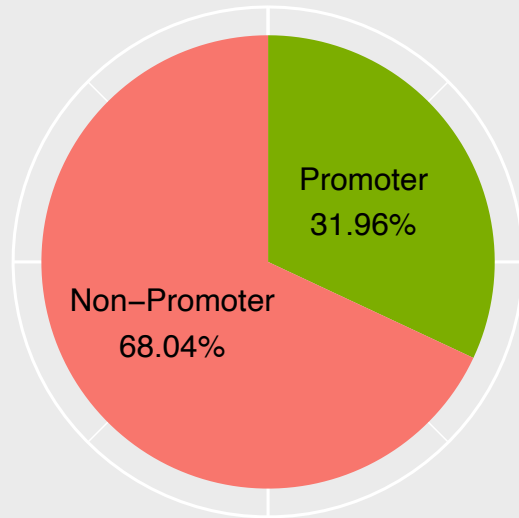

G02

Hypermethylation

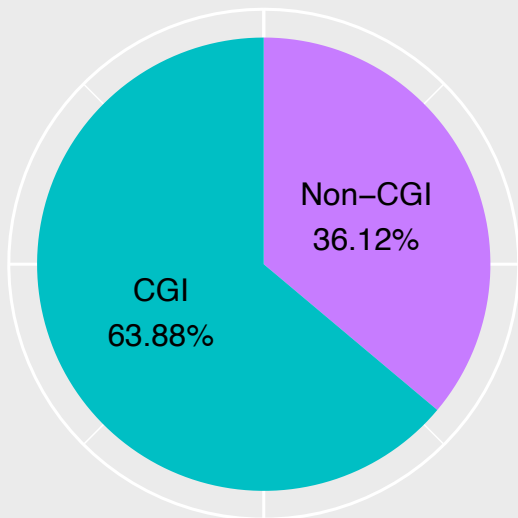

G02

Hypomethylation

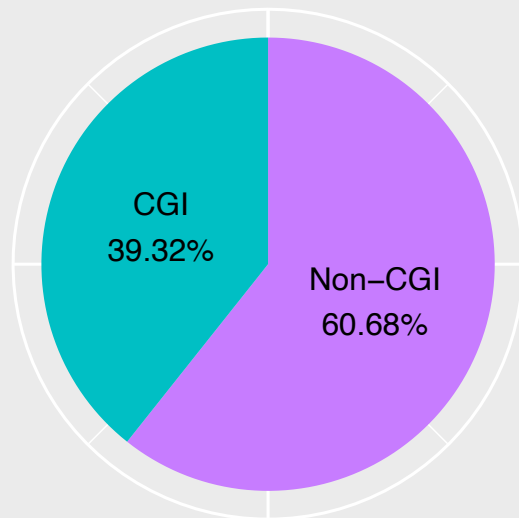

Supplement: Figure_S2.pdf [file Figure_S2.pdf]
