# Supplementary material for: Identification of DNA methylation patterns and biomarkers for clear-cell renal cell carcinoma by multi-omics data analysis
Source: PeerJ journal article supplement (doi:10.7717/peerj.9654), 2020-08-03
Supplement: Figure_S3.pdf [file Figure_S3.pdf]

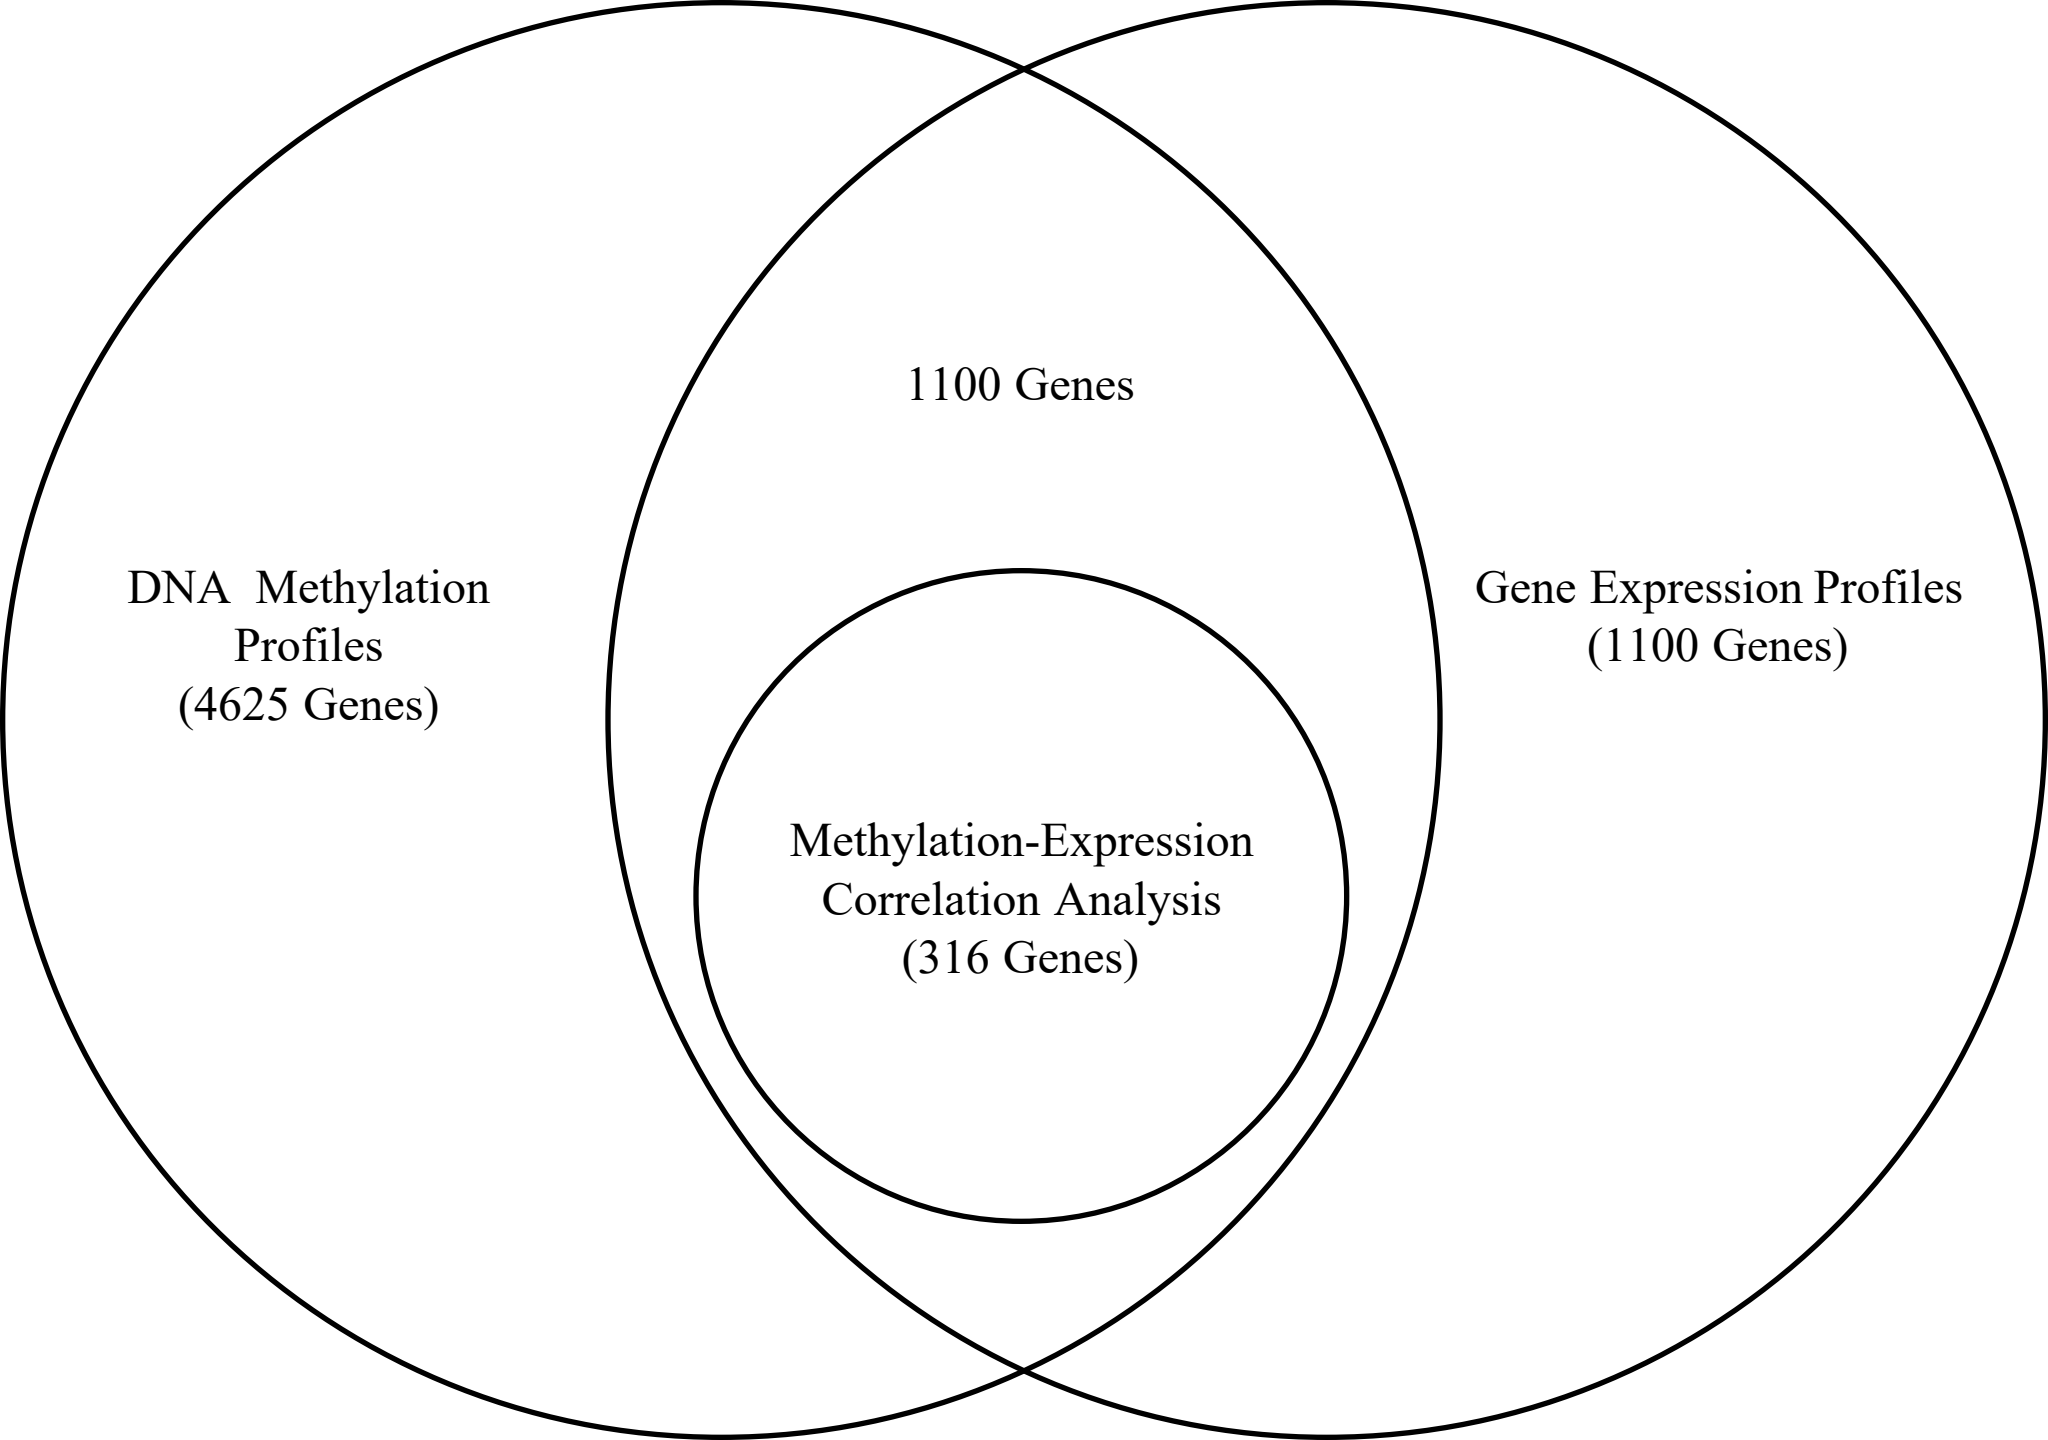

DNA Methylation Profiles  
(4625 Genes)

1100 Genes

Gene Expression Profiles  
(1100 Genes)

Methylation-Expression  
Correlation Analysis  
(316 Genes)
