# Supplementary material for: Identification of DNA methylation patterns and biomarkers for clear-cell renal cell carcinoma by multi-omics data analysis
Source: PeerJ journal article supplement (doi:10.7717/peerj.9654), 2020-08-03

ROC curve in the testing set

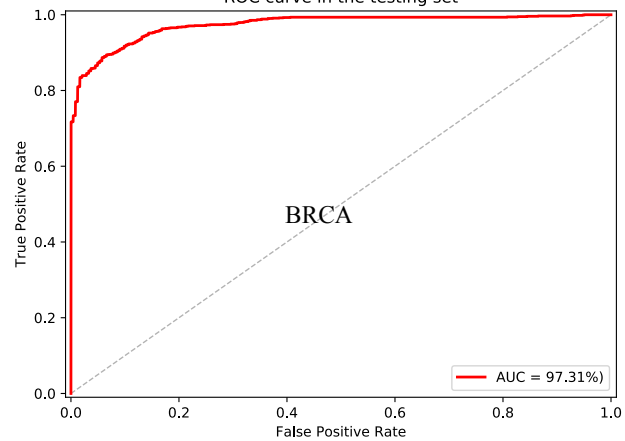

ROC curve in the testing set

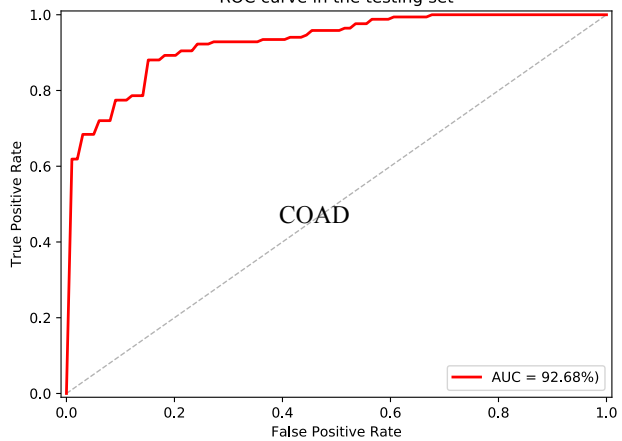

ROC curve in the testing set

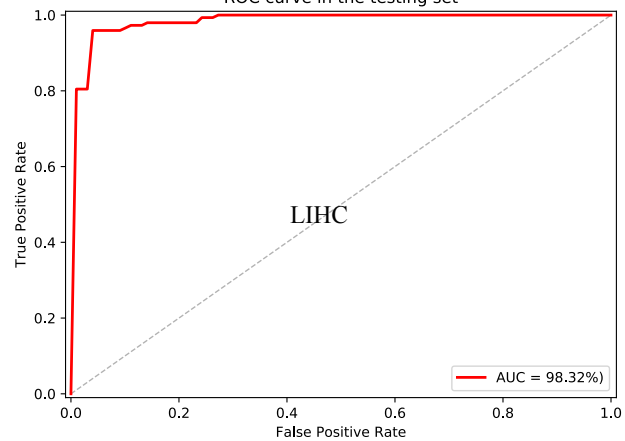

ROC curve in the testing set

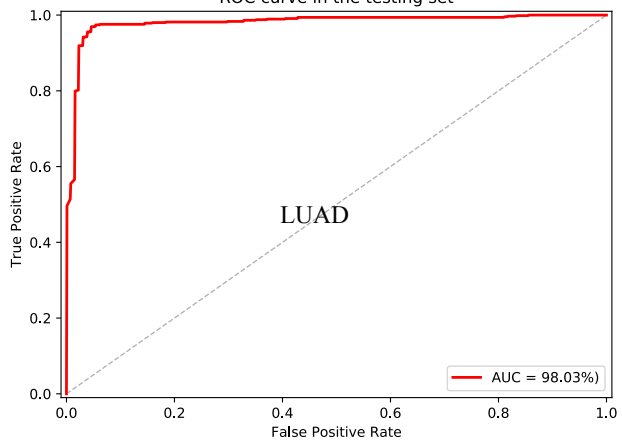

ROC curve in the testing set

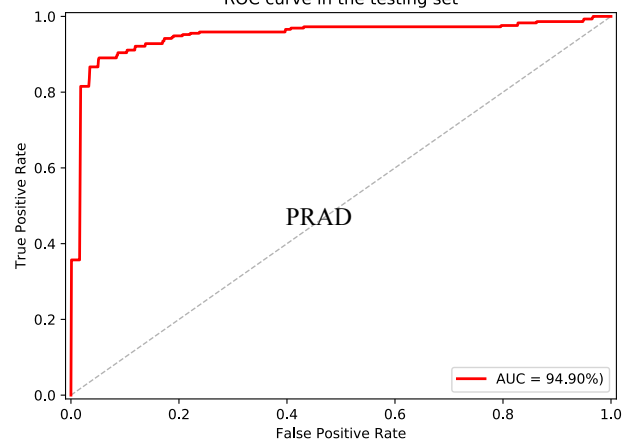

Supplement: Figure_S5.pdf [file Figure_S5.pdf]
