# Supplementary material for: Identification of DNA methylation patterns and biomarkers for clear-cell renal cell carcinoma by multi-omics data analysis
Source: PeerJ journal article supplement (doi:10.7717/peerj.9654), 2020-08-03

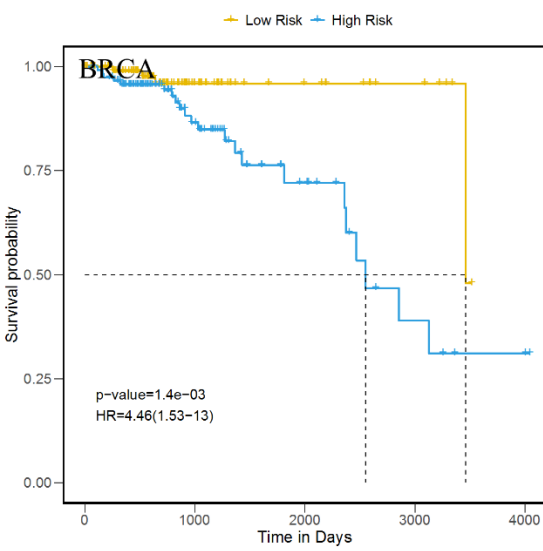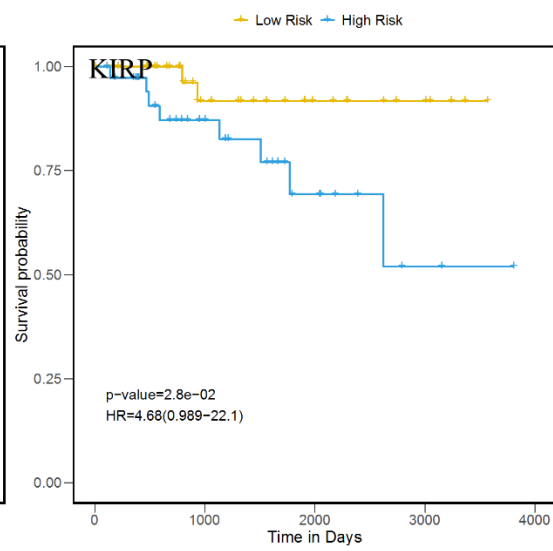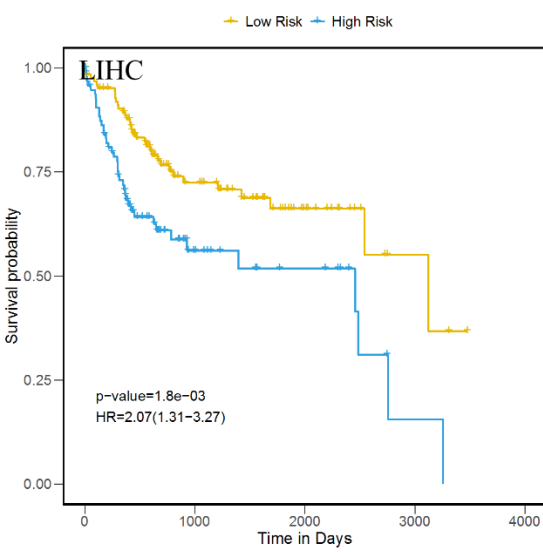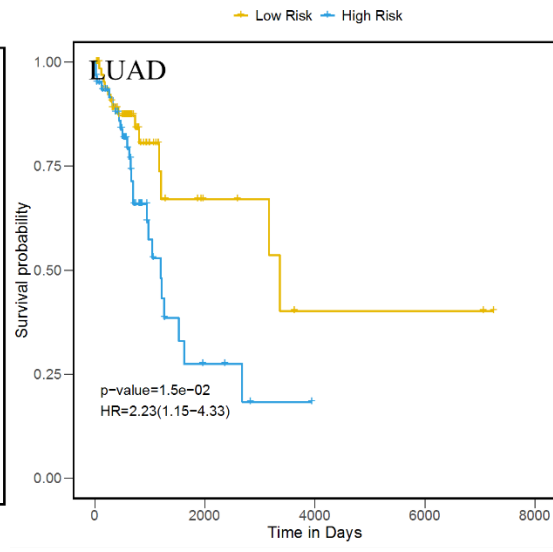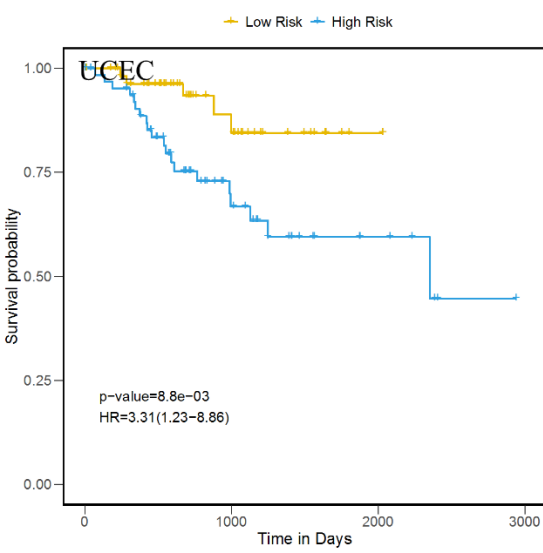

Supplement: Figure_S8.pdf [file Figure_S8.pdf]
