# Supplementary material for: Identification of DNA methylation patterns and biomarkers for clear-cell renal cell carcinoma by multi-omics data analysis
Source: PeerJ. 2020 Aug 3;8:e9654. doi: 10.7717/peerj.9654 (PMC7409785; doi:10.7717/peerj.9654)
Supplement: Supplemental Information 1 [file peerj-08-9654-s001.xlsx]

## Sheet: Description
	Table S1 Characteristics of subjects and tumors

## Sheet: Table_S1
	Table S1 Characteristics of subjects and tumors
	Characteristic	Classes	Valuea
	Sex	Female	54
		Male	106
	Stage	Early(Stages I-II)	71
		Late(Stages III-IV)	89
	Ageb	<63	89
		>=63	71
	Smokingc	Never-smokers	NULL
		Current-somkers	NULL
	Obesityd	Obesity	NULL
		Non-Obesity	NULL
	Hypertension	Hypertension	NULL
		Non-Hypertension	NULL
	a The number of ccRCC patients; NULL: since the relevant information is not collected in the TCGA database, the record is null
	b Range (38-90yr, mean = 63yr)
	c Never-smokers (defined here as less than 100 cigarettes in a lifetime)
	d BMI index
