# Supplementary material for: Identification of DNA methylation patterns and biomarkers for clear-cell renal cell carcinoma by multi-omics data analysis
Source: PeerJ. 2020 Aug 3;8:e9654. doi: 10.7717/peerj.9654 (PMC7409785; doi:10.7717/peerj.9654)
Supplement: Supplemental Information 2 [file peerj-08-9654-s002.xlsx]

## Sheet: Description
	Table S2 Gene exhibiting abnormal methylation and expression in ccRCC.

## Sheet: Table_S2
	Table S2 Gene exhibiting abnormal methylation and expression in ccRCC.
	Top genes hypermethylated (hypomethylated) and under-expressed (over-expressed) in ccRCC with significant negative methylation-expression correlations (FDR < 0.05) (CpG sites exhibiting the largest correlation coefficient magnitude for each gene are shown)
	Gene name	Difference in gene expression	Difference in DNA methylation	Correlation coefficient	Methylation-Expressiona
	BSND	-9.73999	0.261254	-0.807371	Hyper / Under
	FOXI1	-9.46691	0.419521	-0.735454	Hyper / Under
	PRR35	-9.1316	0.208275	-0.688667	Hyper / Under
	MUC15	-8.9195	0.411746	-0.784195	Hyper / Under
	GABRA2	-8.82649	0.37758	-0.819909	Hyper / Under
	PLA2G4F	-8.6357	0.394005	-0.749864	Hyper / Under
	TFAP2B	-8.61492	0.242116	-0.777898	Hyper / Under
	CLDN8	-8.34189	0.475703	-0.784547	Hyper / Under
	PIK3C2G	-8.3222	0.192729	-0.747069	Hyper / Under
	GRHL2	-7.98746	0.299979	-0.668693	Hyper / Under
	GUCA2B	5.6628	-0.27075	-0.661447	Hypo / Over
	PPDPFL	5.38259	-0.209181	-0.627985	Hypo / Over
	MYEOV	4.90124	-0.301158	-0.721776	Hypo / Over
	FABP6	4.63658	-0.241291	-0.766392	Hypo / Over
	LINC01587	4.56771	-0.242228	-0.675206	Hypo / Over
	CA9	4.56316	-0.436651	-0.843031	Hypo / Over
	GRIK3	4.45067	-0.289702	-0.712359	Hypo / Over
	IL20RB	4.29115	-0.246409	-0.798524	Hypo / Over
	FGG	4.2403	-0.27176	-0.740122	Hypo / Over
	SLC6A3	4.21334	-0.237354	-0.705574	Hypo / Over
	aHyper / Under represented genes with hypermethylation and under-expression; Hypo / Over represented genes with hypomethylation and over-expression.
