# Supplementary material for: Identification of DNA methylation patterns and biomarkers for clear-cell renal cell carcinoma by multi-omics data analysis
Source: PeerJ. 2020 Aug 3;8:e9654. doi: 10.7717/peerj.9654 (PMC7409785; doi:10.7717/peerj.9654)
Supplement: Supplemental Information 5 [file peerj-08-9654-s005.xlsx]

## Sheet: Description
	Table S5 Genes exhibiting tandem promoter and gene body methylation from GEO (KIRC) datasets.

## Sheet: Table_S5
	Table S5 Genes exhibiting tandem promoter and gene body methylation from GEO (KIRC) datasets. Genes harboring gene body CpG sites with positive methylation-expression relationships and promoter CpG sites with negative methylation-expression relationships.
	Methy450	mRAN	Genes	CpGs	Rhoa	mRNA_LFCb	Mehty450_LFCc	Positiond
	GSE61441	GSE40435	C1QL1	cg23598718	0.23	0.14	0.5	Body
	GSE61441	GSE40435	C1QL1	cg08988179	0.072	0.14	0.33	Body
	GSE61441	GSE40435	C1QL1	cg24042242	0.055	0.14	1.1	Body
	GSE61441	GSE40435	C1QL1	cg20184238	-0.042	0.14	-0.16	TSS1500
	GSE61441	GSE40435	C1QL1	cg27436940	-0.12	0.14	-0.33	TSS1500
	GSE61441	GSE40435	C1QL1	cg13105945	0.098	0.14	0.22	Body
	GSE61441	GSE40435	C1QL1	cg03371613	0.082	0.14	0.84	Body
	GSE61441	GSE40435	C1QL1	cg24945657	0.14	0.14	1.1	Body
	GSE61441	GSE40435	C1QL1	cg16772514	-0.024	0.14	-0.18	TSS1500
	GSE61441	GSE40435	C1QL1	cg02395846	0.039	0.14	0.62	Body
	GSE61441	GSE40435	C1QL1	cg23540704	-0.053	0.14	-0.12	TSS1500
	GSE61441	GSE40435	CA10	cg04881814	-0.14	-0.23	0.24	TSS1500;5'UTR
	GSE61441	GSE40435	CA10	cg07723251	-0.15	-0.23	0.14	TSS1500
	GSE61441	GSE40435	CA10	cg20405017	-0.054	-0.23	0.83	1stExon;5'UTR
	GSE61441	GSE40435	CA10	cg13125157	-0.022	-0.23	0.91	TSS1500;TSS200
	GSE61441	GSE40435	CA10	cg14054928	-0.052	-0.23	0.82	1stExon;5'UTR
	GSE61441	GSE40435	CA10	cg08034077	-0.072	-0.23	1	1stExon;5'UTR
	GSE61441	GSE40435	CA10	cg20552747	-0.018	-0.23	0.58	TSS1500;TSS200
	GSE61441	GSE40435	CA10	cg08605326	-0.073	-0.23	0.69	TSS1500;TSS200
	GSE61441	GSE40435	CD6	cg10158843	0.11	0.16	0.3	Body
	GSE61441	GSE40435	CD6	cg27098804	0.096	0.16	0.32	Body
	GSE61441	GSE40435	CD6	cg08354187	0.068	0.16	0.13	Body
	GSE61441	GSE40435	CD6	cg10981907	0.06	0.16	1.7	Body
	GSE61441	GSE40435	CD6	cg19307003	0.12	0.16	0.27	Body
	GSE61441	GSE40435	CD6	cg01877352	0.0071	0.16	0.73	Body
	GSE61441	GSE40435	CD7	cg00891191	-0.013	0.12	-0.011	TSS1500
	GSE61441	GSE40435	CD7	cg25662857	-0.008	0.12	-0.19	TSS200
	GSE61441	GSE40435	CD7	cg01038738	-0.16	0.12	-0.029	TSS1500
	GSE61441	GSE40435	COL23A1	cg08354401	0.067	0.44	0.015	Body
	GSE61441	GSE40435	COL23A1	cg13339881	0.005	0.44	0.12	Body
	GSE61441	GSE40435	COL23A1	cg22960186	-0.12	0.44	-0.0062	1stExon;5'UTR
	GSE61441	GSE40435	COL23A1	cg20194689	0.033	0.44	0.37	Body
	GSE61441	GSE40435	COL23A1	cg06730250	0.064	0.44	0.041	Body
	GSE61441	GSE40435	EPN3	cg01687402	0.16	-0.089	-0.058	Body
	GSE61441	GSE40435	EPN3	cg01182926	0.19	-0.089	-0.00084	Body
	GSE61441	GSE40435	EPN3	cg12791192	0.1	-0.089	-0.84	Body
	GSE61441	GSE40435	EPN3	cg04267101	0.046	-0.089	-0.28	Body
	GSE61441	GSE40435	EPN3	cg08842032	-0.04	-0.089	0.11	5'UTR
	GSE61441	GSE40435	EYA4	cg26449787	-0.0051	-0.031	2.2	TSS1500
	GSE61441	GSE40435	EYA4	cg05085230	-0.0091	-0.031	2.2	TSS200
	GSE61441	GSE40435	EYA4	cg01805282	-0.068	-0.031	0.82	5'UTR
	GSE61441	GSE40435	EYA4	cg21390624	-0.018	-0.031	0.52	TSS1500
	GSE61441	GSE40435	EYA4	cg01328892	-0.065	-0.031	1.3	TSS200
	GSE61441	GSE40435	EYA4	cg18714224	-0.039	-0.031	0.17	5'UTR
	GSE61441	GSE40435	EYA4	cg12152919	-0.25	-0.031	1.3	TSS1500
	GSE61441	GSE40435	EYA4	cg06393563	-0.013	-0.031	1.3	5'UTR
	GSE61441	GSE40435	EYA4	cg10675276	-0.0027	-0.031	0.86	TSS1500
	GSE61441	GSE40435	EYA4	cg14817541	-0.11	-0.031	0.96	5'UTR
	GSE61441	GSE40435	EYA4	cg24842760	-0.13	-0.031	0.39	TSS1500
	GSE61441	GSE40435	EYA4	cg01957732	-0.026	-0.031	0.58	TSS1500
	GSE61441	GSE40435	EYA4	cg08712932	-0.0019	-0.031	2.1	TSS200
	GSE61441	GSE40435	EYA4	cg02446647	-0.025	-0.031	1.4	TSS1500
	GSE61441	GSE40435	EYA4	cg07327468	-0.12	-0.031	0.58	TSS1500
	GSE61441	GSE40435	EYA4	cg05493394	-0.17	-0.031	1.7	TSS1500
	GSE61441	GSE40435	EYA4	cg17722675	-0.045	-0.031	1.1	5'UTR
	GSE61441	GSE40435	EYA4	cg01401376	-0.03	-0.031	1.1	5'UTR
	GSE61441	GSE40435	EYA4	cg20286200	-0.057	-0.031	2.2	TSS1500
	GSE61441	GSE40435	EYA4	cg26501369	-0.074	-0.031	0.55	TSS1500
	GSE61441	GSE40435	EYA4	cg20980055	-0.018	-0.031	2.2	TSS1500
	GSE61441	GSE40435	EYA4	cg22462983	-0.029	-0.031	0.44	TSS1500
	GSE61441	GSE40435	EYA4	cg06181518	-0.12	-0.031	1	TSS1500
	GSE61441	GSE40435	EYA4	cg24675448	-0.18	-0.031	1.2	5'UTR
	GSE61441	GSE40435	EYA4	cg17838029	-0.078	-0.031	0.63	TSS200
	GSE61441	GSE40435	EYA4	cg06525347	-0.14	-0.031	0.12	TSS1500
	GSE61441	GSE40435	GABRA2	cg15918284	-0.048	-0.09	1.7	TSS1500
	GSE61441	GSE40435	GABRA2	cg14778074	-0.17	-0.09	1.3	TSS200;5'UTR
	GSE61441	GSE40435	GABRA2	cg23160016	-0.13	-0.09	2.2	1stExon;TSS1500;5'UTR
	GSE61441	GSE40435	GABRA2	cg12858909	-0.16	-0.09	0.36	1stExon;5'UTR
	GSE61441	GSE40435	GABRA2	cg24244752	-0.13	-0.09	1.4	TSS1500;5'UTR
	GSE61441	GSE40435	GABRA2	cg18440897	-0.078	-0.09	1.3	TSS200;5'UTR
	GSE61441	GSE40435	GABRA2	cg09679234	-0.13	-0.09	2.1	TSS1500
	GSE61441	GSE40435	GABRA2	cg02620694	-0.039	-0.09	1.8	TSS200;5'UTR
	GSE61441	GSE40435	GABRA2	cg20092102	-0.22	-0.09	2	1stExon;TSS1500;5'UTR
	GSE61441	GSE40435	GABRA2	cg23676588	-0.056	-0.09	1.7	TSS1500
	GSE61441	GSE40435	GABRA2	cg02172018	-0.0023	-0.09	1.3	1stExon;5'UTR
	GSE61441	GSE40435	GABRA2	cg21820677	-0.041	-0.09	1.4	TSS1500
	GSE61441	GSE40435	GABRA2	cg02633148	-0.003	-0.09	1	TSS200;5'UTR
	GSE61441	GSE40435	GABRA2	cg21540437	-0.13	-0.09	1.2	TSS1500;5'UTR
	GSE61441	GSE40435	GABRA2	cg00452958	-0.054	-0.09	1.4	1stExon;5'UTR
	GSE61441	GSE40435	GABRA2	cg14411873	-0.023	-0.09	1.4	TSS200;5'UTR
	GSE61441	GSE40435	IKZF1	cg16120742	-0.053	0.12	-0.39	5'UTR
	GSE61441	GSE40435	IKZF1	cg08250918	0.0012	0.12	0.2	Body
	GSE61441	GSE40435	IKZF1	cg23720063	0.1	0.12	0.018	Body
	GSE61441	GSE40435	ITGAX	cg06266302	0.12	0.12	0.23	Body
	GSE61441	GSE40435	ITGAX	cg09259710	0.14	0.12	0.038	Body
	GSE61441	GSE40435	ITGAX	cg05059438	0.21	0.12	0.11	Body
	GSE61441	GSE40435	LYPD6	cg04021856	-0.042	-0.058	0.8	5'UTR
	GSE61441	GSE40435	LYPD6	cg03933572	-0.16	-0.058	0.32	5'UTR
	GSE61441	GSE40435	MAN1C1	cg16585234	-0.096	-0.15	0.25	1stExon
	GSE61441	GSE40435	MAN1C1	cg09254142	-0.31	-0.15	0.12	TSS200
	GSE61441	GSE40435	MAN1C1	cg16836311	-0.12	-0.15	0.7	1stExon
	GSE61441	GSE40435	MYO1G	cg12803068	0.074	0.16	0.3	Body
	GSE61441	GSE40435	MYO1G	cg19089201	0.024	0.16	0.54	Body
	GSE61441	GSE40435	MYO1G	cg04180046	0.055	0.16	0.41	Body
	GSE61441	GSE40435	NRG1	cg25230074	-0.027	-0.014	0.35	1stExon;5'UTR
	GSE61441	GSE40435	NRG1	cg06397379	-0.19	-0.014	0.047	TSS1500
	GSE61441	GSE40435	NRG1	cg18387156	-0.0046	-0.014	0.88	TSS1500
	GSE61441	GSE40435	NRG1	cg03349819	-0.076	-0.014	0.13	TSS1500
	GSE61441	GSE40435	NRG1	cg20369838	0.013	-0.014	-0.051	Body
	GSE61441	GSE40435	NRG1	cg08695336	-0.17	-0.014	0.47	1stExon;5'UTR
	GSE61441	GSE40435	NRG1	cg04555373	-0.0049	-0.014	2.1	TSS1500
	GSE61441	GSE40435	RNF150	cg19538890	-0.15	-0.28	1.1	TSS200
	GSE61441	GSE40435	RNF150	cg20852605	-0.23	-0.28	0.64	TSS200
	GSE61441	GSE40435	RNF150	cg05212802	-0.025	-0.28	0.67	1stExon
	GSE61441	GSE40435	RNF150	cg03563667	-0.35	-0.28	0.26	1stExon;5'UTR
	GSE61441	GSE40435	RNF150	cg22495037	-0.028	-0.28	0.043	TSS1500
	GSE61441	GSE40435	RNF150	cg03112087	-0.084	-0.28	1.2	1stExon
	GSE61441	GSE40435	RNF150	cg08440521	-0.058	-0.28	0.094	TSS1500
	GSE61441	GSE40435	RNF150	cg16696645	-0.0023	-0.28	0.14	TSS200
	GSE61441	GSE40435	RUNX3	cg26421310	0.15	0.14	0.62	Body
	GSE61441	GSE40435	RUNX3	cg13629563	0.044	0.14	0.94	Body
	GSE61441	GSE40435	RUNX3	cg04250451	0.018	0.14	0.4	Body
	GSE61441	GSE40435	RUNX3	cg18087266	0.018	0.14	0.49	Body
	GSE61441	GSE40435	RUNX3	cg22737001	0.053	0.14	0.71	Body
	GSE61441	GSE40435	RUNX3	cg21406271	0.03	0.14	0.75	Body
	GSE61441	GSE40435	RUNX3	cg00117172	0.088	0.14	0.95	Body
	GSE61441	GSE40435	RUNX3	cg15712177	0.16	0.14	0.059	Body
	GSE61441	GSE40435	RUNX3	cg20670361	0.028	0.14	0.6	Body
	GSE61441	GSE40435	RUNX3	cg11018723	0.022	0.14	0.68	Body
	GSE61441	GSE40435	RUNX3	cg11336061	0.033	0.14	0.053	Body
	GSE61441	GSE40435	RUNX3	cg03171924	0.00014	0.14	0.53	Body
	GSE61441	GSE40435	RUNX3	cg19590532	0.037	0.14	0.47	Body
	GSE61441	GSE40435	SRGAP3	cg01177100	0.16	-0.083	-0.019	Body
	GSE61441	GSE40435	SRGAP3	cg12019990	0.037	-0.083	-0.011	Body
	GSE61441	GSE40435	SRGAP3	cg17340779	0.07	-0.083	-0.0059	Body
	GSE61441	GSE40435	SRGAP3	cg05733104	0.06	-0.083	-0.19	Body
	GSE61441	GSE40435	SRGAP3	cg07451641	0.031	-0.083	-0.22	Body
	GSE61441	GSE40435	SRGAP3	cg01530962	0.018	-0.083	-0.049	Body
	GSE61441	GSE40435	SRGAP3	cg13008935	0.065	-0.083	-0.055	Body
	GSE61441	GSE40435	STC2	cg06439005	0.18	0.35	0.4	Body
	GSE61441	GSE40435	STC2	cg19728382	-0.17	0.35	-0.36	TSS1500
	GSE61441	GSE40435	STC2	cg19773855	0.083	0.35	0.15	Body
	GSE61441	GSE40435	TFAP2A	cg11063729	-0.12	-0.092	0.54	TSS200
	GSE61441	GSE40435	TFAP2A	cg10899301	-0.064	-0.092	0.16	TSS1500
	GSE61441	GSE40435	TFAP2A	cg14993900	-0.04	-0.092	0.013	TSS1500
	GSE61441	GSE40435	TFAP2A	cg25739875	-0.038	-0.092	0.81	1stExon;5'UTR
	GSE61441	GSE40435	TFAP2A	cg02622074	-0.062	-0.092	0.61	1stExon;5'UTR
	GSE61441	GSE40435	TFAP2A	cg16226962	-0.027	-0.092	0.41	TSS1500
	GSE61441	GSE40435	TFAP2A	cg12439899	-0.05	-0.092	0.58	1stExon;5'UTR
	GSE61441	GSE40435	TFAP2A	cg01158822	-0.13	-0.092	0.89	1stExon
	GSE61441	GSE40435	TFAP2A	cg25940847	-0.082	-0.092	0.18	1stExon;5'UTR
	GSE61441	GSE40435	TFAP2A	cg20777920	0.09	-0.092	-0.085	Body
	GSE61441	GSE40435	TFAP2A	cg02376553	0.03	-0.092	-0.11	Body
	GSE61441	GSE40435	TFAP2A	cg23535596	-0.072	-0.092	0.25	TSS1500
	GSE61441	GSE40435	TFAP2A	cg18732032	-0.03	-0.092	0.53	TSS200
	GSE61441	GSE40435	TFAP2A	cg09255586	-0.11	-0.092	0.68	TSS1500
	GSE61441	GSE40435	TFAP2A	cg02397497	-0.053	-0.092	0.96	1stExon;5'UTR
	GSE61441	GSE40435	TFAP2A	cg14009588	-0.13	-0.092	1.3	TSS200
	GSE61441	GSE40435	TFAP2A	cg00906973	-0.029	-0.092	0.82	TSS200
	GSE61441	GSE40435	TFAP2A	cg14909730	-0.072	-0.092	1.6	TSS200
	GSE61441	GSE40435	TFAP2A	cg15219145	-0.022	-0.092	0.83	1stExon;5'UTR
	GSE61441	GSE40435	TFAP2A	cg22836400	-0.18	-0.092	1.2	TSS200
	GSE61441	GSE40435	TFAP2A	cg15442419	0.013	-0.092	-0.14	Body
	GSE61441	GSE40435	TFAP2A	cg02162880	-0.1	-0.092	0.92	TSS200
	GSE61441	GSE40435	TFAP2A	cg07721569	-0.053	-0.092	0.68	TSS1500
	GSE61441	GSE40435	TFAP2A	cg16871519	-0.13	-0.092	1.3	TSS200
	GSE61441	GSE40435	TFAP2A	cg17557766	-0.055	-0.092	0.019	TSS1500
	GSE61441	GSE40435	TFAP2A	cg23273935	-0.3	-0.092	0.23	1stExon;5'UTR
	GSE61441	GSE40435	TFAP2A	cg03719083	-0.0006	-0.092	0.33	1stExon;5'UTR
	GSE61441	GSE40435	TFAP2A	cg27152208	0.12	-0.092	-0.21	Body
	GSE61441	GSE40435	TFAP2A	cg20540714	-0.093	-0.092	0.63	TSS1500
	GSE61441	GSE40435	TFAP2A	cg13373589	-0.11	-0.092	0.23	TSS1500
	GSE61441	GSE40435	TMEM30B	cg10081469	-0.084	-0.29	0.24	1stExon;5'UTR
	GSE61441	GSE40435	TMEM30B	cg01546243	-0.23	-0.29	0.57	1stExon;5'UTR
	GSE61441	GSE40435	TMEM30B	cg19705215	-0.24	-0.29	0.18	1stExon
	GSE61441	GSE40435	TMEM30B	cg15891218	-0.14	-0.29	0.12	1stExon;5'UTR
	GSE61441	GSE40435	TMEM30B	cg10749808	-0.22	-0.29	0.12	1stExon
	GSE61441	GSE40435	TMEM30B	cg04373359	-0.14	-0.29	0.35	1stExon
	GSE61441	GSE40435	TMEM30B	cg01084740	-0.29	-0.29	0.094	1stExon;5'UTR
	GSE61441	GSE76351	C1QL1	cg03385864	-0.2	-0.0084	0.76	1stExon
	GSE61441	GSE76351	C1QL1	cg00416934	0.42	-0.0084	-0.2	Body
	GSE61441	GSE76351	C1QL1	cg13818573	-0.28	-0.0084	0.57	1stExon
	GSE61441	GSE76351	C1QL1	cg19226007	-0.45	-0.0084	0.82	1stExon
	GSE61441	GSE76351	C1QL1	cg17594131	-0.0043	-0.0084	0.32	TSS1500
	GSE61441	GSE76351	C1QL1	cg17316185	-0.55	-0.0084	0.042	TSS1500
	GSE61441	GSE76351	C1QL1	cg04819499	-0.2	-0.0084	0.78	1stExon
	GSE61441	GSE76351	C1QL1	cg15891422	-0.33	-0.0084	0.097	1stExon
	GSE61441	GSE76351	CD7	cg11294761	-0.012	0.086	-0.0058	TSS200
	GSE61441	GSE76351	CREB3L3	cg19717216	0.086	-0.006	-0.02	Body
	GSE61441	GSE76351	EYA4	cg18714224	-0.15	-0.26	0.17	5'UTR
	GSE61441	GSE76351	EYA4	cg15729404	-0.058	-0.26	0.065	TSS1500
	GSE61441	GSE76351	GABRA2	cg09430391	-0.61	-0.7	0.29	TSS1500
	GSE61441	GSE76351	IKZF1	cg18044562	0.16	0.65	0.14	Body
	GSE61441	GSE76351	LYPD6	cg05310920	-0.11	-0.21	0.0017	TSS1500
	GSE61441	GSE76351	MAN1C1	cg20333927	-0.015	-0.48	0.1	TSS1500
	GSE61441	GSE76351	NRG1	cg03349819	-0.15	-0.1	0.13	TSS1500
	GSE61441	GSE76351	RNF150	cg16696645	-0.09	-0.27	0.14	TSS200
	GSE61441	GSE76351	RUNX3	cg26421310	0.028	0.22	0.62	Body
	GSE61441	GSE76351	RUNX3	cg03769939	0.03	0.22	0.1	Body
	GSE61441	GSE76351	RUNX3	cg05656688	0.029	0.22	0.032	Body
	GSE61441	GSE76351	RUNX3	cg11336061	0.016	0.22	0.053	Body
	GSE61441	GSE76351	SRGAP3	cg01177100	0.1	-0.28	-0.019	Body
	GSE61441	GSE76351	SRGAP3	cg03863358	0.29	-0.28	-0.0031	Body
	GSE61441	GSE76351	STC2	cg19773855	0.3	0.51	0.15	Body
	GSE61441	GSE76351	TFAP2A	cg06880667	-0.12	-0.58	0.085	TSS1500
	GSE61441	GSE76351	TFAP2A	cg11063729	-0.081	-0.58	0.54	TSS200
	GSE61441	GSE76351	TFAP2A	cg10899301	-0.37	-0.58	0.16	TSS1500
	GSE61441	GSE76351	TFAP2A	cg14993900	-0.14	-0.58	0.013	TSS1500
	GSE61441	GSE76351	TFAP2A	cg02622074	-0.29	-0.58	0.61	1stExon;5'UTR
	GSE61441	GSE76351	TFAP2A	cg12439899	-0.26	-0.58	0.58	1stExon;5'UTR
	GSE61441	GSE76351	TFAP2A	cg09288780	-0.37	-0.58	0.053	TSS1500
	GSE61441	GSE76351	TFAP2A	cg09255586	-0.46	-0.58	0.68	TSS1500
	GSE61441	GSE76351	TFAP2A	cg02397497	-0.27	-0.58	0.96	1stExon;5'UTR
	GSE61441	GSE76351	TFAP2A	cg21284680	-0.35	-0.58	0.25	1stExon;5'UTR
	GSE61441	GSE76351	TFAP2A	cg07721569	-0.24	-0.58	0.68	TSS1500
	GSE61441	GSE76351	TFAP2A	cg24902920	-0.18	-0.58	0.037	TSS1500
	GSE61441	GSE76351	TFAP2A	cg23273935	-0.29	-0.58	0.23	1stExon;5'UTR
	GSE61441	GSE76351	TMEM30B	cg01084740	-0.22	-0.54	0.094	1stExon;5'UTR
	GSE61441	GSE76351	TRPM2	cg15258981	0.095	0.13	0.13	Body
	GSE61441	GSE76351	TRPM2	cg01622948	0.044	0.13	0.041	Body
	GSE61441	GSE76351	TRPM2	cg01224657	0.22	0.13	0.043	Body
	GSE61441	GSE76351	TRPM2	cg05754719	0.13	0.13	0.058	Body
	GSE70303	GSE40435	C1QL1	cg03371613	0.55	0.14	0.57	Body
	GSE70303	GSE40435	C1QL1	cg25541078	0.22	0.14	0.011	Body
	GSE70303	GSE40435	C1QL1	cg24945657	0.61	0.14	0.27	Body
	GSE70303	GSE40435	C1QL1	cg23598718	0.18	0.14	1.1	Body
	GSE70303	GSE40435	CA10	cg11144436	0.14	-0.23	-0.47	Body
	GSE70303	GSE40435	CA10	cg14056110	-0.41	-0.23	0.83	TSS1500;5'UTR
	GSE70303	GSE40435	CA10	cg05229989	0.43	-0.23	-0.22	Body
	GSE70303	GSE40435	CA10	cg07101732	0.07	-0.23	-0.2	Body
	GSE70303	GSE40435	CA10	cg22702328	-0.29	-0.23	1.5	1stExon;5'UTR
	GSE70303	GSE40435	CA10	cg07111868	-0.29	-0.23	0.59	TSS1500
	GSE70303	GSE40435	CA10	cg26629942	0.24	-0.23	-0.97	Body
	GSE70303	GSE40435	CA10	ch.17.1364760R	0.07	-0.23	-1.6	Body
	GSE70303	GSE40435	CA10	cg13125157	-0.11	-0.23	1	TSS1500;TSS200
	GSE70303	GSE40435	CA10	cg09486367	0.22	-0.23	-0.42	Body
	GSE70303	GSE40435	CA10	cg08034077	-0.21	-0.23	1.4	1stExon;5'UTR
	GSE70303	GSE40435	CA10	cg22855255	-0.62	-0.23	0.59	TSS1500;5'UTR;TSS200
	GSE70303	GSE40435	CA10	cg24341611	-0.37	-0.23	1.7	1stExon;5'UTR
	GSE70303	GSE40435	CA10	cg20552747	-0.36	-0.23	0.94	TSS1500;TSS200
	GSE70303	GSE40435	CA10	cg21328033	-0.58	-0.23	1.3	1stExon;TSS1500;5'UTR
	GSE70303	GSE40435	CA10	cg06598197	0.32	-0.23	-0.56	Body
	GSE70303	GSE40435	CA10	cg14073722	-0.62	-0.23	0.67	1stExon;5'UTR
	GSE70303	GSE40435	CA10	cg21385821	-0.18	-0.23	1.2	TSS1500
	GSE70303	GSE40435	CA10	cg12691739	0.23	-0.23	-0.84	Body
	GSE70303	GSE40435	CA10	cg14054928	-0.4	-0.23	0.88	1stExon;5'UTR
	GSE70303	GSE40435	CA10	cg07398767	-0.23	-0.23	0.8	TSS1500;5'UTR;TSS200
	GSE70303	GSE40435	CA10	cg25063515	0.28	-0.23	-0.74	Body
	GSE70303	GSE40435	CA10	cg25039722	-0.39	-0.23	1.8	TSS1500;5'UTR
	GSE70303	GSE40435	CA10	cg20405017	-0.26	-0.23	1.2	1stExon;5'UTR
	GSE70303	GSE40435	CA10	cg27504861	0.2	-0.23	-0.44	Body
	GSE70303	GSE40435	CA10	cg25592977	-0.24	-0.23	0.47	1stExon;TSS1500;5'UTR;TSS200
	GSE70303	GSE40435	CD6	cg04046629	0.3	0.16	0.82	Body
	GSE70303	GSE40435	CD6	cg26427109	-0.31	0.16	-0.23	TSS200
	GSE70303	GSE40435	CD6	cg09902130	-0.021	0.16	-0.12	1stExon;5'UTR
	GSE70303	GSE40435	CD6	cg13014558	-0.62	0.16	-0.63	TSS200
	GSE70303	GSE40435	CD6	cg05181784	-0.3	0.16	-1	TSS1500
	GSE70303	GSE40435	CD6	cg09767850	-0.5	0.16	-0.62	TSS1500
	GSE70303	GSE40435	CD6	cg10981907	0.021	0.16	1	Body
	GSE70303	GSE40435	CD6	cg01877352	0.19	0.16	0.54	Body
	GSE70303	GSE40435	CD6	cg12779520	0.12	0.16	0.21	Body
	GSE70303	GSE40435	CD6	cg08354187	0.51	0.16	0.2	Body
	GSE70303	GSE40435	CD6	cg07380416	-0.11	0.16	-0.1	1stExon;5'UTR
	GSE70303	GSE40435	CD6	cg09153080	-0.3	0.16	-0.11	1stExon;5'UTR
	GSE70303	GSE40435	CD6	cg10158843	0.52	0.16	0.46	Body
	GSE70303	GSE40435	CD6	cg27098804	0.59	0.16	0.51	Body
	GSE70303	GSE40435	CD6	cg21939215	-0.063	0.16	-0.2	TSS200
	GSE70303	GSE40435	CD6	cg19307003	0.39	0.16	0.21	Body
	GSE70303	GSE40435	CD6	cg11435466	-0.57	0.16	-0.71	TSS1500
	GSE70303	GSE40435	CD7	cg09944616	-0.007	0.12	-0.44	TSS1500
	GSE70303	GSE40435	CD7	cg06692929	0.098	0.12	0.23	Body
	GSE70303	GSE40435	CD7	cg25662857	-0.1	0.12	-0.34	TSS200
	GSE70303	GSE40435	CD7	cg01038738	-0.6	0.12	-0.051	TSS1500
	GSE70303	GSE40435	CD7	cg11294761	-0.15	0.12	-0.033	TSS200
	GSE70303	GSE40435	CD7	cg25890092	0.26	0.12	0.0032	Body
	GSE70303	GSE40435	CD7	cg25877299	0.2	0.12	0.068	Body
	GSE70303	GSE40435	CD7	cg20186396	-0.2	0.12	-0.073	TSS200
	GSE70303	GSE40435	COL23A1	cg05206633	0.049	0.44	0.015	Body
	GSE70303	GSE40435	COL23A1	cg18634090	0.24	0.44	0.00076	Body
	GSE70303	GSE40435	COL23A1	cg18635361	0.28	0.44	0.19	Body
	GSE70303	GSE40435	COL23A1	cg10730712	-0.028	0.44	-0.11	TSS1500
	GSE70303	GSE40435	COL23A1	cg22212218	0.19	0.44	0.06	Body
	GSE70303	GSE40435	COL23A1	cg23437733	-0.22	0.44	-0.12	TSS200
	GSE70303	GSE40435	COL23A1	cg08930131	0.27	0.44	0.21	Body
	GSE70303	GSE40435	COL23A1	cg18383345	0.63	0.44	0.02	Body
	GSE70303	GSE40435	COL23A1	cg02087079	0.19	0.44	0.47	Body
	GSE70303	GSE40435	COL23A1	cg11043002	0.18	0.44	0.57	Body
	GSE70303	GSE40435	COL23A1	cg25437410	-0.45	0.44	-0.025	TSS200
	GSE70303	GSE40435	COL23A1	cg23075480	0.38	0.44	0.12	Body
	GSE70303	GSE40435	COL23A1	cg14652773	0.23	0.44	0.39	Body
	GSE70303	GSE40435	COL23A1	cg12385811	0.86	0.44	0.0036	Body
	GSE70303	GSE40435	COL23A1	cg20764887	0.21	0.44	3	Body
	GSE70303	GSE40435	COL23A1	cg25770135	0.24	0.44	0.029	Body
	GSE70303	GSE40435	COL23A1	cg02343715	0.55	0.44	0.021	Body
	GSE70303	GSE40435	COL23A1	cg06485308	0.37	0.44	0.018	Body
	GSE70303	GSE40435	COL23A1	cg07858195	0.21	0.44	0.003	Body
	GSE70303	GSE40435	COL23A1	cg26440059	0.084	0.44	0.18	Body
	GSE70303	GSE40435	COL23A1	cg22960186	-0.56	0.44	-0.031	1stExon;5'UTR
	GSE70303	GSE40435	COL23A1	cg23984294	0.55	0.44	0.072	Body
	GSE70303	GSE40435	COL23A1	cg06449486	0.53	0.44	0.036	Body
	GSE70303	GSE40435	COL23A1	cg06730250	0.48	0.44	0.25	Body
	GSE70303	GSE40435	COL23A1	cg24705158	0.18	0.44	0.31	Body
	GSE70303	GSE40435	COL23A1	cg07729453	0.59	0.44	0.14	Body
	GSE70303	GSE40435	COL23A1	cg19488785	0.35	0.44	0.7	Body
	GSE70303	GSE40435	COL23A1	cg22051146	0.14	0.44	0.37	Body
	GSE70303	GSE40435	COL23A1	cg06758672	0.57	0.44	0.04	Body
	GSE70303	GSE40435	COL23A1	cg06675187	0.27	0.44	0.023	Body
	GSE70303	GSE40435	COL23A1	cg00986130	0.49	0.44	0.13	Body
	GSE70303	GSE40435	COL23A1	cg22649181	0.66	0.44	0.14	Body
	GSE70303	GSE40435	COL23A1	cg23336321	0.33	0.44	0.043	Body
	GSE70303	GSE40435	COL23A1	cg07145979	0.42	0.44	0.0049	Body
	GSE70303	GSE40435	COL23A1	cg17638160	0.36	0.44	0.05	Body
	GSE70303	GSE40435	COL23A1	cg20194689	0.28	0.44	0.49	Body
	GSE70303	GSE40435	COL23A1	cg11191555	0.7	0.44	0.26	Body
	GSE70303	GSE40435	COL23A1	cg05008898	0.43	0.44	0.013	Body
	GSE70303	GSE40435	COL23A1	cg11256387	-0.007	0.44	-0.12	TSS1500
	GSE70303	GSE40435	COL23A1	cg17444747	0.26	0.44	0.35	Body
	GSE70303	GSE40435	COL23A1	cg26993940	0.69	0.44	0.035	Body
	GSE70303	GSE40435	COL23A1	cg11770816	0.27	0.44	0.26	Body
	GSE70303	GSE40435	COL23A1	cg13957818	0.24	0.44	0.04	Body
	GSE70303	GSE40435	COL23A1	cg08438091	0.38	0.44	0.02	Body
	GSE70303	GSE40435	COL23A1	cg25554212	0.15	0.44	0.37	Body
	GSE70303	GSE40435	COL23A1	cg17781721	0.36	0.44	0.091	Body
	GSE70303	GSE40435	COL23A1	cg00234625	0.24	0.44	0.1	Body
	GSE70303	GSE40435	COL23A1	cg08632081	0.35	0.44	0.011	Body
	GSE70303	GSE40435	COL23A1	cg08354401	0.34	0.44	0.079	Body
	GSE70303	GSE40435	COL23A1	cg12194832	0.014	0.44	0.12	Body
	GSE70303	GSE40435	COL23A1	cg09001527	0.51	0.44	0.12	Body
	GSE70303	GSE40435	COL23A1	cg09154933	0.13	0.44	0.01	Body
	GSE70303	GSE40435	COL23A1	cg10987720	0.19	0.44	0.033	Body
	GSE70303	GSE40435	CREB3L3	cg16212074	0.15	0.047	0.24	Body
	GSE70303	GSE40435	CREB3L3	cg20154618	-0.23	0.047	-1.5	1stExon;5'UTR
	GSE70303	GSE40435	CREB3L3	cg19717216	0.063	0.047	0.12	Body
	GSE70303	GSE40435	CREB3L3	cg20640432	-0.4	0.047	-1.5	TSS200
	GSE70303	GSE40435	CREB3L3	cg13509147	-0.34	0.047	-0.87	TSS200
	GSE70303	GSE40435	CREB3L3	cg18542377	0.46	0.047	0.058	Body
	GSE70303	GSE40435	CREB3L3	cg04524040	-0.41	0.047	-1.1	TSS1500
	GSE70303	GSE40435	CREB3L3	cg10009657	-0.32	0.047	-1.1	TSS1500
	GSE70303	GSE40435	CREB3L3	cg23777956	-0.26	0.047	-1.1	1stExon;5'UTR
	GSE70303	GSE40435	CREB3L3	cg19771372	-0.29	0.047	-0.57	1stExon;5'UTR
	GSE70303	GSE40435	EHF	cg18414381	-0.45	-0.19	0.38	5'UTR
	GSE70303	GSE40435	EHF	cg18560551	-0.063	-0.19	0.43	5'UTR
	GSE70303	GSE40435	EHF	cg05503887	-0.52	-0.19	0.076	TSS1500
	GSE70303	GSE40435	EHF	cg14022090	-0.14	-0.19	0.2	TSS1500
	GSE70303	GSE40435	EPN3	cg16010178	-0.41	-0.089	0.25	5'UTR
	GSE70303	GSE40435	EPN3	cg10567637	-0.12	-0.089	0.029	TSS200
	GSE70303	GSE40435	EPN3	cg04267101	0.27	-0.089	-0.63	Body
	GSE70303	GSE40435	EPN3	cg01687402	0.063	-0.089	-0.04	Body
	GSE70303	GSE40435	EPN3	cg08842032	-0.36	-0.089	0.38	5'UTR
	GSE70303	GSE40435	EPN3	cg03117819	-0.3	-0.089	0.2	1stExon;5'UTR
	GSE70303	GSE40435	EPN3	cg27437806	0.084	-0.089	-0.15	Body
	GSE70303	GSE40435	EPN3	cg04242396	-0.16	-0.089	0.072	TSS1500
	GSE70303	GSE40435	EPN3	cg09827751	-0.35	-0.089	0.24	TSS1500
	GSE70303	GSE40435	EPN3	cg24006361	-0.07	-0.089	0.2	1stExon;5'UTR
	GSE70303	GSE40435	EYA4	cg21607030	-0.48	-0.031	0.77	5'UTR
	GSE70303	GSE40435	EYA4	cg10782703	0.091	-0.031	-0.25	Body
	GSE70303	GSE40435	EYA4	cg06393563	-0.52	-0.031	1.7	5'UTR
	GSE70303	GSE40435	EYA4	cg20286200	-0.12	-0.031	1.2	TSS1500
	GSE70303	GSE40435	EYA4	cg13912545	-0.56	-0.031	0.57	TSS1500
	GSE70303	GSE40435	EYA4	cg26501369	-0.27	-0.031	1.2	TSS1500
	GSE70303	GSE40435	EYA4	cg17348951	-0.52	-0.031	0.092	TSS1500
	GSE70303	GSE40435	EYA4	cg11664500	-0.014	-0.031	2.8	TSS200
	GSE70303	GSE40435	EYA4	cg20787173	-0.042	-0.031	1.9	TSS200
	GSE70303	GSE40435	EYA4	cg24176563	-0.47	-0.031	1.2	1stExon;5'UTR
	GSE70303	GSE40435	EYA4	cg14343214	-0.13	-0.031	0.43	TSS1500
	GSE70303	GSE40435	EYA4	cg01957732	-0.021	-0.031	1.7	TSS1500
	GSE70303	GSE40435	EYA4	cg13283932	0.32	-0.031	-0.0093	Body
	GSE70303	GSE40435	EYA4	cg17838029	-0.39	-0.031	0.21	TSS200
	GSE70303	GSE40435	EYA4	cg07817705	0.021	-0.031	-0.051	Body
	GSE70303	GSE40435	EYA4	cg01401376	-0.14	-0.031	0.52	5'UTR
	GSE70303	GSE40435	EYA4	cg21390624	-0.14	-0.031	1.1	TSS1500
	GSE70303	GSE40435	EYA4	cg06181518	-0.13	-0.031	0.21	TSS1500
	GSE70303	GSE40435	EYA4	cg12152919	-0.27	-0.031	1.1	TSS1500
	GSE70303	GSE40435	EYA4	cg17722675	-0.47	-0.031	1.2	5'UTR
	GSE70303	GSE40435	EYA4	cg01162672	-0.049	-0.031	1.5	TSS1500
	GSE70303	GSE40435	EYA4	cg20330472	-0.27	-0.031	0.67	TSS1500
	GSE70303	GSE40435	EYA4	cg05493394	-0.38	-0.031	1.3	TSS1500
	GSE70303	GSE40435	EYA4	cg08885224	-0.19	-0.031	0.044	TSS1500
	GSE70303	GSE40435	EYA4	cg01328892	-0.46	-0.031	0.38	TSS200
	GSE70303	GSE40435	EYA4	cg05085230	-0.035	-0.031	3.2	TSS200
	GSE70303	GSE40435	EYA4	cg15729404	-0.22	-0.031	0.82	TSS1500
	GSE70303	GSE40435	EYA4	cg14270292	-0.25	-0.031	2.6	1stExon;5'UTR
	GSE70303	GSE40435	EYA4	cg08712932	-0.028	-0.031	2.8	TSS200
	GSE70303	GSE40435	EYA4	cg22871668	-0.084	-0.031	3.3	TSS200
	GSE70303	GSE40435	EYA4	cg06525347	-0.19	-0.031	0.51	TSS1500
	GSE70303	GSE40435	EYA4	cg06764333	-0.07	-0.031	0.9	5'UTR
	GSE70303	GSE40435	EYA4	cg07327468	-0.28	-0.031	0.87	TSS1500
	GSE70303	GSE40435	EYA4	cg14817541	-0.43	-0.031	0.51	5'UTR
	GSE70303	GSE40435	EYA4	cg20611276	-0.22	-0.031	1.5	TSS1500
	GSE70303	GSE40435	EYA4	cg21296676	-0.41	-0.031	0.64	TSS1500
	GSE70303	GSE40435	EYA4	cg02446647	-0.042	-0.031	1.6	TSS1500
	GSE70303	GSE40435	EYA4	cg14287112	-0.17	-0.031	2.9	TSS200
	GSE70303	GSE40435	EYA4	cg24675448	-0.54	-0.031	0.2	5'UTR
	GSE70303	GSE40435	EYA4	cg26656135	-0.48	-0.031	0.81	1stExon;5'UTR
	GSE70303	GSE40435	EYA4	cg24842760	-0.19	-0.031	1.1	TSS1500
	GSE70303	GSE40435	EYA4	cg01805282	-0.2	-0.031	0.74	5'UTR
	GSE70303	GSE40435	EYA4	cg24535176	-0.28	-0.031	0.056	TSS1500
	GSE70303	GSE40435	GABRA2	cg14411873	-0.07	-0.09	1.2	TSS200;5'UTR
	GSE70303	GSE40435	GABRA2	cg02172018	-0.1	-0.09	2	1stExon;5'UTR
	GSE70303	GSE40435	GABRA2	cg00452958	-0.29	-0.09	0.63	1stExon;5'UTR
	GSE70303	GSE40435	GABRA2	cg14778074	-0.18	-0.09	0.89	TSS200;5'UTR
	GSE70303	GSE40435	GABRA2	cg12858909	-0.48	-0.09	0.26	1stExon;5'UTR
	GSE70303	GSE40435	GABRA2	cg07813249	-0.42	-0.09	3	TSS200;TSS1500
	GSE70303	GSE40435	GABRA2	cg09679234	-0.33	-0.09	1.7	TSS1500
	GSE70303	GSE40435	GABRA2	cg15918284	-0.51	-0.09	1.4	TSS1500
	GSE70303	GSE40435	GABRA2	cg27080171	0.24	-0.09	-0.48	Body
	GSE70303	GSE40435	GABRA2	cg20092102	-0.45	-0.09	1.2	1stExon;TSS1500;5'UTR
	GSE70303	GSE40435	GABRA2	cg21540437	-0.19	-0.09	3.2	TSS1500;5'UTR
	GSE70303	GSE40435	GABRA2	cg25145765	-0.28	-0.09	2.6	1stExon;5'UTR
	GSE70303	GSE40435	GABRA2	cg21820677	-0.028	-0.09	1.9	TSS1500
	GSE70303	GSE40435	GABRA2	cg08206959	-0.28	-0.09	1.6	TSS200;5'UTR
	GSE70303	GSE40435	GABRA2	cg23160016	-0.31	-0.09	2.3	1stExon;TSS1500;5'UTR
	GSE70303	GSE40435	GLIS1	cg08711113	0.22	-0.0041	-0.025	Body
	GSE70303	GSE40435	GLIS1	cg18787908	0.12	-0.0041	-0.0034	Body
	GSE70303	GSE40435	GLIS1	cg06905679	0.2	-0.0041	-0.096	Body
	GSE70303	GSE40435	GLIS1	cg24741609	-0.61	-0.0041	0.16	5'UTR
	GSE70303	GSE40435	GLIS1	cg09007354	-0.46	-0.0041	0.036	5'UTR
	GSE70303	GSE40435	GLIS1	cg10962490	-0.31	-0.0041	0.1	5'UTR
	GSE70303	GSE40435	GLIS1	cg16701840	0.39	-0.0041	-0.17	Body
	GSE70303	GSE40435	IKZF1	cg06728077	0.26	0.12	0.011	Body
	GSE70303	GSE40435	IKZF1	cg07858905	0.23	0.12	0.032	Body
	GSE70303	GSE40435	IKZF1	cg15576869	0.29	0.12	0.034	Body
	GSE70303	GSE40435	IKZF1	cg08072980	0.49	0.12	0.057	Body
	GSE70303	GSE40435	ITGAX	cg09716762	0.57	0.12	0.35	Body
	GSE70303	GSE40435	ITGAX	cg09259710	0.59	0.12	0.049	Body
	GSE70303	GSE40435	ITGAX	cg26233914	-0.26	0.12	-1.2	1stExon;5'UTR
	GSE70303	GSE40435	ITGAX	cg03859495	0.16	0.12	0.25	Body
	GSE70303	GSE40435	ITGAX	cg05059438	0.77	0.12	0.41	Body
	GSE70303	GSE40435	ITGAX	cg11884546	-0.2	0.12	-0.71	TSS200
	GSE70303	GSE40435	ITGAX	cg08178991	0.52	0.12	0.022	Body
	GSE70303	GSE40435	ITGAX	cg06266302	0.61	0.12	0.59	Body
	GSE70303	GSE40435	ITGAX	cg17889137	0.72	0.12	0.35	Body
	GSE70303	GSE40435	ITGAX	cg05644767	-0.2	0.12	-0.22	TSS1500
	GSE70303	GSE40435	ITGAX	cg01888869	-0.29	0.12	-0.73	TSS200
	GSE70303	GSE40435	ITGAX	cg04742550	-0.29	0.12	-1.9	TSS200
	GSE70303	GSE40435	ITGAX	cg02311374	0.48	0.12	0.67	Body
	GSE70303	GSE40435	LYPD6	cg10770187	-0.26	-0.058	0.28	TSS200
	GSE70303	GSE40435	LYPD6	cg03933572	-0.6	-0.058	0.43	5'UTR
	GSE70303	GSE40435	LYPD6	cg09500672	-0.32	-0.058	0.32	TSS1500
	GSE70303	GSE40435	LYPD6	cg04021856	-0.18	-0.058	0.79	5'UTR
	GSE70303	GSE40435	LYPD6	cg14335275	-0.15	-0.058	0.43	TSS200
	GSE70303	GSE40435	LYPD6	cg05095252	0.014	-0.058	-0.55	Body
	GSE70303	GSE40435	LYPD6	cg20360286	-0.12	-0.058	0.45	5'UTR
	GSE70303	GSE40435	LYPD6	cg02474731	-0.52	-0.058	0.069	TSS1500
	GSE70303	GSE40435	MAN1C1	cg16585234	-0.64	-0.15	0.63	1stExon
	GSE70303	GSE40435	MAN1C1	cg19595760	0.13	-0.15	-0.036	Body
	GSE70303	GSE40435	MAN1C1	cg12701302	0.13	-0.15	-0.028	Body
	GSE70303	GSE40435	MAN1C1	cg20333927	-0.028	-0.15	0.2	TSS1500
	GSE70303	GSE40435	MAN1C1	cg10485752	0.13	-0.15	-0.46	Body
	GSE70303	GSE40435	MAN1C1	cg03519967	0.007	-0.15	-0.57	Body
	GSE70303	GSE40435	MAN1C1	cg04631202	-0.35	-0.15	0.014	TSS1500
	GSE70303	GSE40435	MAN1C1	cg22125902	0.007	-0.15	-0.28	Body
	GSE70303	GSE40435	MAN1C1	cg16836311	-0.39	-0.15	1.2	1stExon
	GSE70303	GSE40435	MAN1C1	cg16176834	0.13	-0.15	-0.00046	Body
	GSE70303	GSE40435	MUC15	cg03087937	-0.37	-0.18	0.23	5'UTR
	GSE70303	GSE40435	MUC15	cg22946774	0.68	-0.18	-0.59	Body
	GSE70303	GSE40435	MUC15	cg06056884	-0.25	-0.18	0.47	1stExon;5'UTR
	GSE70303	GSE40435	MUC15	cg16215361	-0.67	-0.18	0.33	TSS1500
	GSE70303	GSE40435	MUC15	cg03079754	-0.44	-0.18	0.58	TSS1500
	GSE70303	GSE40435	MUC15	cg16643473	-0.38	-0.18	0.57	TSS200
	GSE70303	GSE40435	MYO1G	cg12803068	0.4	0.16	0.3	Body
	GSE70303	GSE40435	MYO1G	cg04180046	0.29	0.16	0.36	Body
	GSE70303	GSE40435	MYO1G	cg19089201	0.007	0.16	0.58	Body
	GSE70303	GSE40435	MYO1G	cg22132788	0.021	0.16	0.48	Body
	GSE70303	GSE40435	NRG1	cg09939075	0.14	-0.014	-0.15	Body
	GSE70303	GSE40435	NRG1	cg18387156	-0.15	-0.014	0.84	TSS1500
	GSE70303	GSE40435	NRG1	cg17661135	0.091	-0.014	-0.26	Body
	GSE70303	GSE40435	NRG1	cg08699680	0.098	-0.014	-0.012	Body
	GSE70303	GSE40435	NRG1	cg12196232	-0.077	-0.014	0.56	1stExon;5'UTR
	GSE70303	GSE40435	NRG1	cg13618529	0.091	-0.014	-0.03	Body
	GSE70303	GSE40435	NRG1	cg20541191	-0.22	-0.014	0.4	TSS200
	GSE70303	GSE40435	NRG1	cg05861515	-0.077	-0.014	0.23	1stExon;5'UTR
	GSE70303	GSE40435	NRG1	cg00614182	-0.07	-0.014	1.1	1stExon
	GSE70303	GSE40435	NRG1	cg15431703	-0.007	-0.014	0.03	1stExon
	GSE70303	GSE40435	NRG1	cg08695336	-0.056	-0.014	0.0024	1stExon;5'UTR
	GSE70303	GSE40435	NRG1	cg10870165	0.042	-0.014	-0.19	Body
	GSE70303	GSE40435	NRG1	cg26068079	-0.15	-0.014	0.08	1stExon;5'UTR
	GSE70303	GSE40435	NRG1	cg16623836	-0.55	-0.014	0.014	1stExon
	GSE70303	GSE40435	NRG1	cg11481675	-0.15	-0.014	0.15	1stExon;5'UTR
	GSE70303	GSE40435	NRG1	cg03430846	-0.17	-0.014	1.6	TSS200
	GSE70303	GSE40435	NRG1	cg25050565	0.17	-0.014	-0.23	Body
	GSE70303	GSE40435	NRG1	cg14598943	-0.28	-0.014	0.51	1stExon;5'UTR
	GSE70303	GSE40435	NRG1	cg05303728	0.18	-0.014	-0.23	Body
	GSE70303	GSE40435	NRG1	cg22651812	0.2	-0.014	-0.031	Body
	GSE70303	GSE40435	NRG1	cg14663451	-0.17	-0.014	0.3	1stExon;5'UTR
	GSE70303	GSE40435	NRG1	cg04555373	-0.12	-0.014	2.7	TSS1500
	GSE70303	GSE40435	NRG1	cg08776832	-0.24	-0.014	0.77	TSS1500
	GSE70303	GSE40435	OLFM4	cg24932628	-0.4	-0.12	0.41	1stExon
	GSE70303	GSE40435	OLFM4	cg02570298	0.14	-0.12	-0.76	Body
	GSE70303	GSE40435	RAB25	cg19580810	-0.38	-0.32	0.47	1stExon;5'UTR
	GSE70303	GSE40435	RAB25	cg19406511	0.19	-0.32	-1.7	Body
	GSE70303	GSE40435	RAB25	cg09243900	-0.22	-0.32	0.58	TSS200
	GSE70303	GSE40435	RAB25	cg02448190	-0.29	-0.32	0.0027	TSS1500
	GSE70303	GSE40435	RAB25	cg15896939	-0.28	-0.32	0.52	TSS200
	GSE70303	GSE40435	RNF150	cg22495037	-0.24	-0.28	0.11	TSS1500
	GSE70303	GSE40435	RNF150	cg08440521	-0.13	-0.28	0.049	TSS1500
	GSE70303	GSE40435	RNF150	cg18921637	0.43	-0.28	-0.11	Body
	GSE70303	GSE40435	RNF150	cg24053721	-0.23	-0.28	0.65	1stExon;5'UTR
	GSE70303	GSE40435	RNF150	cg05212802	-0.55	-0.28	0.27	1stExon
	GSE70303	GSE40435	RNF150	cg00563678	0.34	-0.28	-0.3	Body
	GSE70303	GSE40435	RNF150	cg13953838	0.11	-0.28	-0.084	Body
	GSE70303	GSE40435	RNF150	cg25898520	0.16	-0.28	-0.18	Body
	GSE70303	GSE40435	RNF150	cg20910361	0.43	-0.28	-0.27	Body
	GSE70303	GSE40435	RNF150	cg19661610	-0.077	-0.28	0.15	TSS200
	GSE70303	GSE40435	RNF150	cg22261207	0.091	-0.28	-0.19	Body
	GSE70303	GSE40435	RNF150	cg20599022	-0.11	-0.28	1.5	1stExon;5'UTR
	GSE70303	GSE40435	RNF150	cg07262168	0.36	-0.28	-0.42	Body
	GSE70303	GSE40435	RUNX3	cg13898430	-0.22	0.14	-0.21	TSS1500
	GSE70303	GSE40435	RUNX3	cg13566436	0.31	0.14	0.19	Body
	GSE70303	GSE40435	RUNX3	cg20288927	0.077	0.14	0.0093	Body
	GSE70303	GSE40435	RUNX3	cg16581179	0.71	0.14	0.0079	Body
	GSE70303	GSE40435	RUNX3	cg10013501	0.035	0.14	0.71	Body
	GSE70303	GSE40435	RUNX3	cg10993442	0.035	0.14	0.61	Body
	GSE70303	GSE40435	RUNX3	cg02083428	0.5	0.14	0.00034	Body
	GSE70303	GSE40435	RUNX3	cg20695936	0.36	0.14	0.91	Body
	GSE70303	GSE40435	RUNX3	cg20674490	0.38	0.14	0.34	Body
	GSE70303	GSE40435	RUNX3	cg11336061	0.11	0.14	0.27	Body
	GSE70303	GSE40435	RUNX3	cg16574073	0.11	0.14	0.38	Body
	GSE70303	GSE40435	RUNX3	cg09862941	0.18	0.14	0.024	Body
	GSE70303	GSE40435	RUNX3	cg24019564	0.007	0.14	1.4	Body
	GSE70303	GSE40435	RUNX3	cg07801894	-0.049	0.14	-0.2	TSS1500
	GSE70303	GSE40435	RUNX3	cg26183671	0.25	0.14	0.014	Body
	GSE70303	GSE40435	RUNX3	cg15711976	0.063	0.14	0.034	Body
	GSE70303	GSE40435	RUNX3	cg18087266	0.098	0.14	0.94	Body
	GSE70303	GSE40435	RUNX3	cg25882256	0.084	0.14	1.2	Body
	GSE70303	GSE40435	RUNX3	cg04907595	0.049	0.14	0.79	Body
	GSE70303	GSE40435	RUNX3	cg25470148	0.056	0.14	1.2	Body
	GSE70303	GSE40435	RUNX3	cg25178645	0.43	0.14	0.0027	Body
	GSE70303	GSE40435	RUNX3	cg13106389	0.24	0.14	0.91	Body
	GSE70303	GSE40435	RUNX3	cg15963463	0.084	0.14	1.5	Body
	GSE70303	GSE40435	RUNX3	cg04221877	0.028	0.14	0.93	Body
	GSE70303	GSE40435	RUNX3	cg21217270	0.31	0.14	0.31	Body
	GSE70303	GSE40435	RUNX3	cg19270505	-0.35	0.14	-0.78	1stExon;5'UTR
	GSE70303	GSE40435	RUNX3	cg26864395	0.098	0.14	0.33	Body
	GSE70303	GSE40435	RUNX3	cg24842859	0.24	0.14	1.1	Body
	GSE70303	GSE40435	RUNX3	cg15014975	0.035	0.14	2	Body
	GSE70303	GSE40435	RUNX3	cg02970551	-0.22	0.14	-0.79	TSS1500
	GSE70303	GSE40435	RUNX3	cg22153728	-0.11	0.14	-0.24	TSS200
	GSE70303	GSE40435	RUNX3	cg05656688	0.098	0.14	0.26	Body
	GSE70303	GSE40435	RUNX3	cg26672794	-0.45	0.14	-0.086	TSS1500
	GSE70303	GSE40435	RUNX3	cg05162523	0.38	0.14	0.25	Body
	GSE70303	GSE40435	RUNX3	cg26256263	0.035	0.14	1.6	Body
	GSE70303	GSE40435	RUNX3	cg24463471	0.098	0.14	1.2	Body
	GSE70303	GSE40435	RUNX3	cg03171924	0.23	0.14	1.1	Body
	GSE70303	GSE40435	RUNX3	cg16529592	-0.084	0.14	-0.064	TSS1500
	GSE70303	GSE40435	RUNX3	cg14645650	0.18	0.14	0.019	Body
	GSE70303	GSE40435	RUNX3	cg20670361	0.29	0.14	0.9	Body
	GSE70303	GSE40435	SRGAP3	cg26389316	0.22	-0.083	-0.068	Body
	GSE70303	GSE40435	SRGAP3	cg05376919	-0.021	-0.083	0.24	1stExon;5'UTR
	GSE70303	GSE40435	SRGAP3	cg14623316	0.39	-0.083	-0.0057	Body
	GSE70303	GSE40435	SRGAP3	cg06858559	-0.028	-0.083	0.63	TSS1500
	GSE70303	GSE40435	SRGAP3	cg07439241	0.15	-0.083	-0.028	Body
	GSE70303	GSE40435	SRGAP3	cg23081397	-0.28	-0.083	0.088	1stExon;5'UTR
	GSE70303	GSE40435	SRGAP3	cg27308576	0.049	-0.083	-0.19	Body
	GSE70303	GSE40435	SRGAP3	cg22580937	-0.16	-0.083	0.28	TSS200
	GSE70303	GSE40435	SRGAP3	cg19379924	-0.098	-0.083	0.27	TSS200
	GSE70303	GSE40435	SRGAP3	cg26184741	-0.2	-0.083	0.23	TSS1500
	GSE70303	GSE40435	STC2	cg13329346	0.2	0.35	0.31	Body
	GSE70303	GSE40435	STC2	cg19878194	0.22	0.35	0.011	Body
	GSE70303	GSE40435	STC2	cg10625081	0.29	0.35	0.34	Body
	GSE70303	GSE40435	STC2	cg01984743	0.51	0.35	1.2	Body
	GSE70303	GSE40435	STC2	cg19481287	0.21	0.35	0.62	Body
	GSE70303	GSE40435	STC2	cg15420720	0.43	0.35	1.3	Body
	GSE70303	GSE40435	STC2	cg26721877	-0.36	0.35	-0.67	TSS1500
	GSE70303	GSE40435	STC2	cg18281743	-0.035	0.35	-0.0039	1stExon;5'UTR
	GSE70303	GSE40435	STC2	cg26605683	0.41	0.35	1.7	Body
	GSE70303	GSE40435	TAGLN3	cg03449660	0.24	-0.16	-0.074	Body
	GSE70303	GSE40435	TFAP2A	cg00906973	-0.035	-0.092	1	TSS200
	GSE70303	GSE40435	TFAP2A	cg04389897	0.15	-0.092	-0.1	Body
	GSE70303	GSE40435	TFAP2A	cg14993900	-0.042	-0.092	0.44	TSS1500
	GSE70303	GSE40435	TFAP2A	cg25940847	-0.62	-0.092	0.11	1stExon;5'UTR
	GSE70303	GSE40435	TFAP2A	cg21284680	-0.084	-0.092	1.2	1stExon;5'UTR
	GSE70303	GSE40435	TFAP2A	cg15442419	0.098	-0.092	-0.47	Body
	GSE70303	GSE40435	TFAP2A	cg23535596	-0.1	-0.092	0.42	TSS1500
	GSE70303	GSE40435	TFAP2A	cg17557766	-0.38	-0.092	0.63	TSS1500
	GSE70303	GSE40435	TFAP2A	cg12377424	-0.39	-0.092	0.078	1stExon;5'UTR
	GSE70303	GSE40435	TFAP2A	cg09255586	0.014	-0.092	-0.085	Body
	GSE70303	GSE40435	TMEM30B	cg01835384	0.091	-0.29	-0.52	Body
	GSE70303	GSE40435	TMEM30B	cg01084740	-0.19	-0.29	0.43	1stExon;5'UTR
	GSE70303	GSE40435	TMEM30B	cg01546243	-0.45	-0.29	0.95	1stExon;5'UTR
	GSE70303	GSE40435	TMEM30B	cg10749808	-0.12	-0.29	0.24	1stExon
	GSE70303	GSE40435	TMEM30B	cg15891218	-0.32	-0.29	0.37	1stExon;5'UTR
	GSE70303	GSE40435	TMEM30B	cg10081469	-0.1	-0.29	0.65	1stExon;5'UTR
	GSE70303	GSE76351	C1QL1	cg19226007	-0.39	-0.0084	1.2	1stExon
	GSE70303	GSE76351	C1QL1	cg15891422	-0.45	-0.0084	0.079	1stExon
	GSE70303	GSE76351	C1QL1	cg17316185	-0.11	-0.0084	0.0019	TSS1500
	GSE70303	GSE76351	C1QL1	cg00416934	0.45	-0.0084	-0.21	Body
	GSE70303	GSE76351	C1QL1	cg24042242	0.084	-0.0084	-0.41	Body
	GSE70303	GSE76351	CA10	cg14056110	-0.44	-0.76	0.83	TSS1500;5'UTR
	GSE70303	GSE76351	CA10	cg05229989	0.34	-0.76	-0.22	Body
	GSE70303	GSE76351	CA10	cg22702328	-0.2	-0.76	1.5	1stExon;5'UTR
	GSE70303	GSE76351	CA10	cg07111868	-0.2	-0.76	0.59	TSS1500
	GSE70303	GSE76351	CA10	cg26629942	0.07	-0.76	-0.97	Body
	GSE70303	GSE76351	CA10	cg13125157	-0.13	-0.76	1	TSS1500;TSS200
	GSE70303	GSE76351	CA10	cg08034077	-0.19	-0.76	1.4	1stExon;5'UTR
	GSE70303	GSE76351	CA10	cg22855255	-0.64	-0.76	0.59	TSS1500;5'UTR;TSS200
	GSE70303	GSE76351	CA10	cg24341611	-0.26	-0.76	1.7	1stExon;5'UTR
	GSE70303	GSE76351	CA10	cg20552747	-0.14	-0.76	0.94	TSS1500;TSS200
	GSE70303	GSE76351	CA10	cg21328033	-0.25	-0.76	1.3	1stExon;TSS1500;5'UTR
	GSE70303	GSE76351	CA10	cg06598197	0.056	-0.76	-0.56	Body
	GSE70303	GSE76351	CA10	cg14073722	-0.41	-0.76	0.67	1stExon;5'UTR
	GSE70303	GSE76351	CA10	cg21385821	-0.34	-0.76	1.2	TSS1500
	GSE70303	GSE76351	CA10	cg12691739	0.035	-0.76	-0.84	Body
	GSE70303	GSE76351	CA10	cg14054928	-0.43	-0.76	0.88	1stExon;5'UTR
	GSE70303	GSE76351	CA10	cg07398767	-0.37	-0.76	0.8	TSS1500;5'UTR;TSS200
	GSE70303	GSE76351	CA10	cg25063515	0.45	-0.76	-0.74	Body
	GSE70303	GSE76351	CA10	cg25039722	-0.084	-0.76	1.8	TSS1500;5'UTR
	GSE70303	GSE76351	CA10	cg20405017	-0.11	-0.76	1.2	1stExon;5'UTR
	GSE70303	GSE76351	CA10	cg27504861	0.15	-0.76	-0.44	Body
	GSE70303	GSE76351	CD6	cg04046629	0.24	0.18	0.82	Body
	GSE70303	GSE76351	CD6	cg26427109	-0.31	0.18	-0.23	TSS200
	GSE70303	GSE76351	CD6	cg09902130	-0.035	0.18	-0.12	1stExon;5'UTR
	GSE70303	GSE76351	CD6	cg13014558	-0.27	0.18	-0.63	TSS200
	GSE70303	GSE76351	CD6	cg09767850	-0.1	0.18	-0.62	TSS1500
	GSE70303	GSE76351	CD6	cg10981907	0.2	0.18	1	Body
	GSE70303	GSE76351	CD6	cg01877352	0.4	0.18	0.54	Body
	GSE70303	GSE76351	CD6	cg12779520	0.3	0.18	0.21	Body
	GSE70303	GSE76351	CD6	cg27284288	-0.021	0.18	-0.14	TSS200
	GSE70303	GSE76351	CD6	cg08354187	0.41	0.18	0.2	Body
	GSE70303	GSE76351	CD6	cg07380416	-0.098	0.18	-0.1	1stExon;5'UTR
	GSE70303	GSE76351	CD6	cg09153080	-0.23	0.18	-0.11	1stExon;5'UTR
	GSE70303	GSE76351	CD6	cg10158843	0.5	0.18	0.46	Body
	GSE70303	GSE76351	CD6	cg27098804	0.62	0.18	0.51	Body
	GSE70303	GSE76351	CD6	cg21939215	-0.077	0.18	-0.2	TSS200
	GSE70303	GSE76351	CD6	cg19307003	0.49	0.18	0.21	Body
	GSE70303	GSE76351	CD6	cg11435466	-0.3	0.18	-0.71	TSS1500
	GSE70303	GSE76351	CD7	cg25662857	-0.07	0.086	-0.34	TSS200
	GSE70303	GSE76351	CD7	cg11294761	-0.32	0.086	-0.033	TSS200
	GSE70303	GSE76351	COL23A1	cg18634090	0.13	0.26	0.00076	Body
	GSE70303	GSE76351	COL23A1	cg18635361	0.23	0.26	0.19	Body
	GSE70303	GSE76351	COL23A1	cg22212218	0.091	0.26	0.06	Body
	GSE70303	GSE76351	COL23A1	cg23437733	-0.59	0.26	-0.12	TSS200
	GSE70303	GSE76351	COL23A1	cg08930131	0.063	0.26	0.21	Body
	GSE70303	GSE76351	COL23A1	cg18383345	0.78	0.26	0.02	Body
	GSE70303	GSE76351	COL23A1	cg25437410	-0.67	0.26	-0.025	TSS200
	GSE70303	GSE76351	COL23A1	cg23075480	0.57	0.26	0.12	Body
	GSE70303	GSE76351	COL23A1	cg11577662	0.021	0.26	0.014	Body
	GSE70303	GSE76351	COL23A1	cg14652773	0.19	0.26	0.39	Body
	GSE70303	GSE76351	COL23A1	cg13339881	0.15	0.26	0.21	Body
	GSE70303	GSE76351	COL23A1	cg12385811	0.69	0.26	0.0036	Body
	GSE70303	GSE76351	COL23A1	cg20764887	0.042	0.26	3	Body
	GSE70303	GSE76351	COL23A1	cg25770135	0.29	0.26	0.029	Body
	GSE70303	GSE76351	COL23A1	cg03560256	0.091	0.26	0.35	Body
	GSE70303	GSE76351	COL23A1	cg02343715	0.51	0.26	0.021	Body
	GSE70303	GSE76351	COL23A1	cg07858195	0.36	0.26	0.003	Body
	GSE70303	GSE76351	COL23A1	cg22960186	-0.71	0.26	-0.031	1stExon;5'UTR
	GSE70303	GSE76351	COL23A1	cg23984294	0.35	0.26	0.072	Body
	GSE70303	GSE76351	COL23A1	cg06449486	0.82	0.26	0.036	Body
	GSE70303	GSE76351	COL23A1	cg00237520	0.2	0.26	0.016	Body
	GSE70303	GSE76351	COL23A1	cg06730250	0.45	0.26	0.25	Body
	GSE70303	GSE76351	COL23A1	cg07729453	0.41	0.26	0.14	Body
	GSE70303	GSE76351	COL23A1	cg19488785	0.18	0.26	0.7	Body
	GSE70303	GSE76351	COL23A1	cg22051146	0.049	0.26	0.37	Body
	GSE70303	GSE76351	COL23A1	cg06758672	0.077	0.26	0.04	Body
	GSE70303	GSE76351	COL23A1	cg06675187	0.2	0.26	0.023	Body
	GSE70303	GSE76351	COL23A1	cg00986130	0.36	0.26	0.13	Body
	GSE70303	GSE76351	COL23A1	cg22649181	0.69	0.26	0.14	Body
	GSE70303	GSE76351	COL23A1	cg23336321	0.57	0.26	0.043	Body
	GSE70303	GSE76351	COL23A1	cg07145979	0.29	0.26	0.0049	Body
	GSE70303	GSE76351	COL23A1	cg17638160	0.52	0.26	0.05	Body
	GSE70303	GSE76351	COL23A1	cg20194689	0.13	0.26	0.49	Body
	GSE70303	GSE76351	COL23A1	cg11191555	0.74	0.26	0.26	Body
	GSE70303	GSE76351	COL23A1	cg05008898	0.17	0.26	0.013	Body
	GSE70303	GSE76351	COL23A1	cg17444747	0.36	0.26	0.35	Body
	GSE70303	GSE76351	COL23A1	cg26993940	0.5	0.26	0.035	Body
	GSE70303	GSE76351	COL23A1	cg11770816	0.021	0.26	0.26	Body
	GSE70303	GSE76351	COL23A1	cg13957818	0.5	0.26	0.04	Body
	GSE70303	GSE76351	COL23A1	cg08438091	0.37	0.26	0.02	Body
	GSE70303	GSE76351	COL23A1	cg17781721	0.38	0.26	0.091	Body
	GSE70303	GSE76351	COL23A1	cg08354401	0.098	0.26	0.079	Body
	GSE70303	GSE76351	COL23A1	cg12194832	0.035	0.26	0.12	Body
	GSE70303	GSE76351	COL23A1	cg09001527	0.29	0.26	0.12	Body
	GSE70303	GSE76351	COL23A1	cg09154933	0.2	0.26	0.01	Body
	GSE70303	GSE76351	COL23A1	cg10987720	0.57	0.26	0.033	Body
	GSE70303	GSE76351	EHF	cg18414381	-0.69	-1.1	0.38	5'UTR
	GSE70303	GSE76351	EHF	cg18560551	-0.21	-1.1	0.43	5'UTR
	GSE70303	GSE76351	EHF	cg05503887	-0.77	-1.1	0.076	TSS1500
	GSE70303	GSE76351	EHF	cg14022090	-0.28	-1.1	0.2	TSS1500
	GSE70303	GSE76351	EPN3	cg08449531	-0.15	-0.25	0.34	1stExon;5'UTR
	GSE70303	GSE76351	EPN3	cg16010178	-0.36	-0.25	0.25	5'UTR
	GSE70303	GSE76351	EPN3	cg10567637	-0.13	-0.25	0.029	TSS200
	GSE70303	GSE76351	EPN3	cg00698906	0.24	-0.25	-0.6	Body
	GSE70303	GSE76351	EPN3	cg04267101	0.34	-0.25	-0.63	Body
	GSE70303	GSE76351	EPN3	cg12791192	0.063	-0.25	-1.4	Body
	GSE70303	GSE76351	EPN3	cg08842032	-0.66	-0.25	0.38	5'UTR
	GSE70303	GSE76351	EPN3	cg24236903	-0.44	-0.25	0.39	1stExon;5'UTR
	GSE70303	GSE76351	EPN3	cg03117819	-0.33	-0.25	0.2	1stExon;5'UTR
	GSE70303	GSE76351	EPN3	cg27437806	0.25	-0.25	-0.15	Body
	GSE70303	GSE76351	EPN3	cg04242396	-0.64	-0.25	0.072	TSS1500
	GSE70303	GSE76351	EPN3	cg09827751	-0.41	-0.25	0.24	TSS1500
	GSE70303	GSE76351	EPN3	cg24006361	-0.31	-0.25	0.2	1stExon;5'UTR
	GSE70303	GSE76351	EYA4	cg08917489	-0.063	-0.26	0.27	5'UTR
	GSE70303	GSE76351	EYA4	cg13912545	-0.22	-0.26	0.57	TSS1500
	GSE70303	GSE76351	EYA4	cg13283932	0.28	-0.26	-0.0093	Body
	GSE70303	GSE76351	EYA4	cg17838029	-0.38	-0.26	0.21	TSS200
	GSE70303	GSE76351	EYA4	cg08885224	-0.33	-0.26	0.044	TSS1500
	GSE70303	GSE76351	EYA4	cg15729404	-0.098	-0.26	0.82	TSS1500
	GSE70303	GSE76351	EYA4	cg16347317	-0.13	-0.26	0.35	TSS200
	GSE70303	GSE76351	EYA4	cg17736819	0.36	-0.26	-0.25	Body
	GSE70303	GSE76351	EYA4	cg06525347	-0.59	-0.26	0.51	TSS1500
	GSE70303	GSE76351	EYA4	cg14817541	-0.014	-0.26	0.51	5'UTR
	GSE70303	GSE76351	EYA4	cg21296676	-0.014	-0.26	0.64	TSS1500
	GSE70303	GSE76351	EYA4	cg23028941	0.15	-0.26	-0.11	Body
	GSE70303	GSE76351	EYA4	cg24675448	-0.64	-0.26	0.2	5'UTR
	GSE70303	GSE76351	EYA4	cg14711475	0.21	-0.26	-0.023	Body
	GSE70303	GSE76351	FXYD3	cg21965980	0.37	-0.28	-0.64	Body
	GSE70303	GSE76351	FXYD3	cg01408817	-0.61	-0.28	0.2	TSS200
	GSE70303	GSE76351	FXYD3	cg03322974	-0.25	-0.28	0.16	TSS1500
	GSE70303	GSE76351	FXYD3	cg21122474	-0.42	-0.28	0.31	TSS200
	GSE70303	GSE76351	FXYD3	cg18232841	0.25	-0.28	-0.44	Body
	GSE70303	GSE76351	FXYD3	cg08823209	0.028	-0.28	-0.52	Body
	GSE70303	GSE76351	FXYD3	cg02633817	-0.55	-0.28	0.27	1stExon;5'UTR
	GSE70303	GSE76351	FXYD3	cg02704949	-0.056	-0.28	0.66	5'UTR
	GSE70303	GSE76351	FXYD3	cg00480115	-0.11	-0.28	0.35	5'UTR
	GSE70303	GSE76351	GABRA2	cg02172018	-0.45	-0.7	2	1stExon;5'UTR
	GSE70303	GSE76351	GABRA2	cg00452958	-0.3	-0.7	0.63	1stExon;5'UTR
	GSE70303	GSE76351	GABRA2	cg14778074	-0.098	-0.7	0.89	TSS200;5'UTR
	GSE70303	GSE76351	GABRA2	cg12858909	-0.007	-0.7	0.26	1stExon;5'UTR
	GSE70303	GSE76351	GABRA2	cg24244752	-0.077	-0.7	2.5	TSS1500;5'UTR
	GSE70303	GSE76351	GABRA2	cg07813249	-0.13	-0.7	3	TSS200;TSS1500
	GSE70303	GSE76351	GABRA2	cg09679234	-0.22	-0.7	1.7	TSS1500
	GSE70303	GSE76351	GABRA2	cg15918284	-0.38	-0.7	1.4	TSS1500
	GSE70303	GSE76351	GABRA2	cg20092102	-0.17	-0.7	1.2	1stExon;TSS1500;5'UTR
	GSE70303	GSE76351	GABRA2	cg21540437	-0.24	-0.7	3.2	TSS1500;5'UTR
	GSE70303	GSE76351	GABRA2	cg25145765	-0.056	-0.7	2.6	1stExon;5'UTR
	GSE70303	GSE76351	GABRA2	cg21820677	-0.15	-0.7	1.9	TSS1500
	GSE70303	GSE76351	GABRA2	cg12205729	-0.24	-0.7	2.5	TSS1500;5'UTR
	GSE70303	GSE76351	GABRA2	cg23676588	-0.077	-0.7	1.9	TSS1500
	GSE70303	GSE76351	GABRA2	cg08206959	-0.063	-0.7	1.6	TSS200;5'UTR
	GSE70303	GSE76351	GABRA2	cg23160016	-0.17	-0.7	2.3	1stExon;TSS1500;5'UTR
	GSE70303	GSE76351	GLIS1	cg08711113	0.18	-0.017	-0.025	Body
	GSE70303	GSE76351	GLIS1	cg18787908	0.36	-0.017	-0.0034	Body
	GSE70303	GSE76351	GLIS1	cg06905679	0.32	-0.017	-0.096	Body
	GSE70303	GSE76351	GLIS1	cg24741609	-0.57	-0.017	0.16	5'UTR
	GSE70303	GSE76351	GLIS1	cg09007354	-0.46	-0.017	0.036	5'UTR
	GSE70303	GSE76351	GLIS1	cg10962490	-0.48	-0.017	0.1	5'UTR
	GSE70303	GSE76351	GLIS1	cg16701840	0.24	-0.017	-0.17	Body
	GSE70303	GSE76351	IKZF1	cg06728077	0.36	0.65	0.011	Body
	GSE70303	GSE76351	IKZF1	cg07858905	0.38	0.65	0.032	Body
	GSE70303	GSE76351	IKZF1	cg15576869	0.38	0.65	0.034	Body
	GSE70303	GSE76351	IKZF1	cg08072980	0.48	0.65	0.057	Body
	GSE70303	GSE76351	ITGAX	cg09716762	0.45	0.49	0.35	Body
	GSE70303	GSE76351	ITGAX	cg09259710	0.47	0.49	0.049	Body
	GSE70303	GSE76351	ITGAX	cg26233914	-0.34	0.49	-1.2	1stExon;5'UTR
	GSE70303	GSE76351	ITGAX	cg05059438	0.8	0.49	0.41	Body
	GSE70303	GSE76351	ITGAX	cg11884546	-0.29	0.49	-0.71	TSS200
	GSE70303	GSE76351	ITGAX	cg08178991	0.5	0.49	0.022	Body
	GSE70303	GSE76351	ITGAX	cg06266302	0.57	0.49	0.59	Body
	GSE70303	GSE76351	ITGAX	cg17889137	0.85	0.49	0.35	Body
	GSE70303	GSE76351	ITGAX	cg01888869	-0.3	0.49	-0.73	TSS200
	GSE70303	GSE76351	ITGAX	cg04742550	-0.49	0.49	-1.9	TSS200
	GSE70303	GSE76351	ITGAX	cg02311374	0.66	0.49	0.67	Body
	GSE70303	GSE76351	LYPD6	cg10770187	-0.36	-0.21	0.28	TSS200
	GSE70303	GSE76351	LYPD6	cg03933572	-0.24	-0.21	0.43	5'UTR
	GSE70303	GSE76351	LYPD6	cg09500672	-0.54	-0.21	0.32	TSS1500
	GSE70303	GSE76351	LYPD6	cg04021856	-0.44	-0.21	0.79	5'UTR
	GSE70303	GSE76351	LYPD6	cg14335275	-0.39	-0.21	0.43	TSS200
	GSE70303	GSE76351	LYPD6	cg05095252	0.27	-0.21	-0.55	Body
	GSE70303	GSE76351	LYPD6	cg02474731	-0.58	-0.21	0.069	TSS1500
	GSE70303	GSE76351	MAN1C1	cg16585234	-0.52	-0.48	0.63	1stExon
	GSE70303	GSE76351	MAN1C1	cg05670408	-0.056	-0.48	0.62	1stExon;5'UTR
	GSE70303	GSE76351	MAN1C1	cg12701302	0.13	-0.48	-0.028	Body
	GSE70303	GSE76351	MAN1C1	cg04631202	-0.14	-0.48	0.014	TSS1500
	GSE70303	GSE76351	MAN1C1	cg22125902	0.21	-0.48	-0.28	Body
	GSE70303	GSE76351	MAN1C1	cg16836311	-0.2	-0.48	1.2	1stExon
	GSE70303	GSE76351	MAN1C1	cg16176834	0.36	-0.48	-0.00046	Body
	GSE70303	GSE76351	MAN1C1	cg11538920	-0.007	-0.48	0.17	TSS1500
	GSE70303	GSE76351	MUC15	cg03087937	-0.43	-1.5	0.23	5'UTR
	GSE70303	GSE76351	MUC15	cg22946774	0.5	-1.5	-0.59	Body
	GSE70303	GSE76351	MUC15	cg06056884	-0.42	-1.5	0.47	1stExon;5'UTR
	GSE70303	GSE76351	MUC15	cg16215361	-0.39	-1.5	0.33	TSS1500
	GSE70303	GSE76351	MUC15	cg03079754	-0.29	-1.5	0.58	TSS1500
	GSE70303	GSE76351	MUC15	cg16643473	-0.25	-1.5	0.57	TSS200
	GSE70303	GSE76351	MYO1G	cg07826859	-0.07	0.35	-1.7	TSS1500
	GSE70303	GSE76351	MYO1G	cg09948419	-0.13	0.35	-1.3	TSS1500
	GSE70303	GSE76351	MYO1G	cg10673833	-0.063	0.35	-0.15	TSS200
	GSE70303	GSE76351	MYO1G	cg12803068	0.39	0.35	0.3	Body
	GSE70303	GSE76351	MYO1G	cg22111043	-0.042	0.35	-0.31	TSS1500
	GSE70303	GSE76351	MYO1G	cg06787669	-0.042	0.35	-0.2	TSS200
	GSE70303	GSE76351	MYO1G	cg04180046	0.37	0.35	0.36	Body
	GSE70303	GSE76351	MYO1G	cg19089201	0.26	0.35	0.58	Body
	GSE70303	GSE76351	MYO1G	cg21188037	-0.063	0.35	-0.17	1stExon;5'UTR
	GSE70303	GSE76351	MYO1G	cg22132788	0.19	0.35	0.48	Body
	GSE70303	GSE76351	NRG1	cg09939075	0.55	-0.1	-0.15	Body
	GSE70303	GSE76351	NRG1	cg21968599	0.55	-0.1	-0.01	Body
	GSE70303	GSE76351	NRG1	cg17661135	0.035	-0.1	-0.26	Body
	GSE70303	GSE76351	NRG1	cg04490596	0.54	-0.1	-0.0089	Body
	GSE70303	GSE76351	NRG1	cg13618529	0.14	-0.1	-0.03	Body
	GSE70303	GSE76351	NRG1	cg08122807	0.55	-0.1	-0.044	Body
	GSE70303	GSE76351	NRG1	cg15431703	-0.17	-0.1	0.03	1stExon
	GSE70303	GSE76351	NRG1	cg10870165	0.17	-0.1	-0.19	Body
	GSE70303	GSE76351	NRG1	cg26068079	-0.007	-0.1	0.08	1stExon;5'UTR
	GSE70303	GSE76351	NRG1	cg14597598	-0.091	-0.1	0.31	TSS1500
	GSE70303	GSE76351	NRG1	cg11316943	0.57	-0.1	-0.0023	Body
	GSE70303	GSE76351	NRG1	cg22651812	0.27	-0.1	-0.031	Body
	GSE70303	GSE76351	NRG1	cg14662728	0.26	-0.1	-0.034	Body
	GSE70303	GSE76351	NRG1	cg18118834	0.2	-0.1	-0.12	Body
	GSE70303	GSE76351	NRG1	cg20127899	0.11	-0.1	-0.72	Body
	GSE70303	GSE76351	NRG1	cg05303690	0.07	-0.1	-0.065	Body
	GSE70303	GSE76351	NRG1	cg08776832	-0.55	-0.1	0.77	TSS1500
	GSE70303	GSE76351	OLFM4	cg24932628	-0.51	-0.76	0.41	1stExon
	GSE70303	GSE76351	OLFM4	cg02570298	0.37	-0.76	-0.76	Body
	GSE70303	GSE76351	RAB25	cg19580810	-0.43	-1	0.47	1stExon;5'UTR
	GSE70303	GSE76351	RAB25	cg19406511	0.23	-1	-1.7	Body
	GSE70303	GSE76351	RAB25	cg09243900	-0.31	-1	0.58	TSS200
	GSE70303	GSE76351	RAB25	cg02448190	-0.33	-1	0.0027	TSS1500
	GSE70303	GSE76351	RAB25	cg15896939	-0.36	-1	0.52	TSS200
	GSE70303	GSE76351	RNF150	cg22495037	-0.35	-0.27	0.11	TSS1500
	GSE70303	GSE76351	RNF150	cg08440521	-0.36	-0.27	0.049	TSS1500
	GSE70303	GSE76351	RNF150	cg05212802	-0.23	-0.27	0.27	1stExon
	GSE70303	GSE76351	RNF150	cg13953838	0.21	-0.27	-0.084	Body
	GSE70303	GSE76351	RNF150	cg20910361	0.19	-0.27	-0.27	Body
	GSE70303	GSE76351	RNF150	cg07262168	0.42	-0.27	-0.42	Body
	GSE70303	GSE76351	RUNX3	cg26421310	-0.007	0.22	-1	TSS1500
	GSE70303	GSE76351	RUNX3	cg13898430	-0.36	0.22	-0.21	TSS1500
	GSE70303	GSE76351	RUNX3	cg19590532	0.063	0.22	0.096	Body
	GSE70303	GSE76351	RUNX3	cg13566436	0.38	0.22	0.19	Body
	GSE70303	GSE76351	RUNX3	cg16581179	0.44	0.22	0.0079	Body
	GSE70303	GSE76351	RUNX3	cg27360282	0.57	0.22	6.6e-05	Body
	GSE70303	GSE76351	RUNX3	cg02083428	0.56	0.22	0.00034	Body
	GSE70303	GSE76351	RUNX3	cg10951873	0.22	0.22	0.048	Body
	GSE70303	GSE76351	RUNX3	cg20695936	0.17	0.22	0.91	Body
	GSE70303	GSE76351	RUNX3	cg20674490	0.4	0.22	0.34	Body
	GSE70303	GSE76351	RUNX3	cg11336061	0.19	0.22	0.27	Body
	GSE70303	GSE76351	RUNX3	cg16574073	0.11	0.22	0.38	Body
	GSE70303	GSE76351	RUNX3	cg09862941	0.27	0.22	0.024	Body
	GSE70303	GSE76351	RUNX3	cg07801894	-0.084	0.22	-0.2	TSS1500
	GSE70303	GSE76351	RUNX3	cg23916689	-0.007	0.22	-0.065	TSS1500
	GSE70303	GSE76351	RUNX3	cg26183671	0.28	0.22	0.014	Body
	GSE70303	GSE76351	RUNX3	cg06640822	-0.056	0.22	-0.23	1stExon;5'UTR
	GSE70303	GSE76351	RUNX3	cg12459932	-0.014	0.22	-0.1	TSS1500
	GSE70303	GSE76351	RUNX3	cg15711976	0.007	0.22	0.034	Body
	GSE70303	GSE76351	RUNX3	cg18087266	0.07	0.22	0.94	Body
	GSE70303	GSE76351	RUNX3	cg25882256	0.056	0.22	1.2	Body
	GSE70303	GSE76351	RUNX3	cg00929376	0.056	0.22	1.1	Body
	GSE70303	GSE76351	RUNX3	cg04907595	0.12	0.22	0.79	Body
	GSE70303	GSE76351	RUNX3	cg25470148	0.098	0.22	1.2	Body
	GSE70303	GSE76351	RUNX3	cg20670361	0.2	0.22	0.9	Body
	GSE70303	GSE76351	RUNX3	cg25178645	0.46	0.22	0.0027	Body
	GSE70303	GSE76351	RUNX3	cg13106389	0.17	0.22	0.91	Body
	GSE70303	GSE76351	RUNX3	cg11018723	-0.13	0.22	-1.1	TSS200
	GSE70303	GSE76351	RUNX3	cg19774846	-0.077	0.22	-0.076	TSS1500
	GSE70303	GSE76351	RUNX3	cg15712177	0.035	0.22	0.043	Body
	GSE70303	GSE76351	RUNX3	cg15963463	0.23	0.22	1.5	Body
	GSE70303	GSE76351	RUNX3	cg27058497	-0.014	0.22	-0.32	TSS200
	GSE70303	GSE76351	RUNX3	cg21217270	0.26	0.22	0.31	Body
	GSE70303	GSE76351	RUNX3	cg19270505	-0.56	0.22	-0.78	1stExon;5'UTR
	GSE70303	GSE76351	RUNX3	cg26864395	0.38	0.22	0.33	Body
	GSE70303	GSE76351	RUNX3	cg24842859	0.2	0.22	1.1	Body
	GSE70303	GSE76351	RUNX3	cg02970551	-0.15	0.22	-0.79	TSS1500
	GSE70303	GSE76351	RUNX3	cg22153728	-0.063	0.22	-0.24	TSS200
	GSE70303	GSE76351	RUNX3	cg26672794	-0.36	0.22	-0.086	TSS1500
	GSE70303	GSE76351	RUNX3	cg05162523	0.43	0.22	0.25	Body
	GSE70303	GSE76351	RUNX3	cg26256263	0.056	0.22	1.6	Body
	GSE70303	GSE76351	RUNX3	cg24463471	0.049	0.22	1.2	Body
	GSE70303	GSE76351	RUNX3	cg04757093	0.049	0.22	0.015	Body
	GSE70303	GSE76351	RUNX3	cg03171924	0.13	0.22	1.1	Body
	GSE70303	GSE76351	RUNX3	cg14645650	0.31	0.22	0.019	Body
	GSE70303	GSE76351	SRGAP3	cg16781715	0.084	-0.28	-0.028	Body
	GSE70303	GSE76351	SRGAP3	cg07451641	0.2	-0.28	-1.2	Body
	GSE70303	GSE76351	SRGAP3	cg26389316	0.51	-0.28	-0.068	Body
	GSE70303	GSE76351	SRGAP3	cg02775883	0.049	-0.28	-0.045	Body
	GSE70303	GSE76351	SRGAP3	cg07094169	0.12	-0.28	-0.17	Body
	GSE70303	GSE76351	SRGAP3	cg14623316	0.21	-0.28	-0.0057	Body
	GSE70303	GSE76351	SRGAP3	cg03162101	-0.26	-0.28	0.076	1stExon;5'UTR
	GSE70303	GSE76351	SRGAP3	cg18109665	0.063	-0.28	-0.0037	Body
	GSE70303	GSE76351	SRGAP3	cg06858559	-0.26	-0.28	0.63	TSS1500
	GSE70303	GSE76351	SRGAP3	cg19628771	0.049	-0.28	-0.13	Body
	GSE70303	GSE76351	SRGAP3	cg26359335	0.17	-0.28	-0.15	Body
	GSE70303	GSE76351	SRGAP3	cg08874974	0.24	-0.28	-0.16	Body
	GSE70303	GSE76351	SRGAP3	cg07439241	0.091	-0.28	-0.028	Body
	GSE70303	GSE76351	SRGAP3	cg23081397	-0.28	-0.28	0.088	1stExon;5'UTR
	GSE70303	GSE76351	SRGAP3	cg05733104	0.16	-0.28	-0.086	Body
	GSE70303	GSE76351	SRGAP3	cg27308576	0.26	-0.28	-0.19	Body
	GSE70303	GSE76351	SRGAP3	cg18813545	0.2	-0.28	-0.39	Body
	GSE70303	GSE76351	SRGAP3	cg22580937	-0.46	-0.28	0.28	TSS200
	GSE70303	GSE76351	SRGAP3	cg19379924	-0.27	-0.28	0.27	TSS200
	GSE70303	GSE76351	SRGAP3	cg26184741	-0.17	-0.28	0.23	TSS1500
	GSE70303	GSE76351	STC2	cg13329346	0.15	0.51	0.31	Body
	GSE70303	GSE76351	STC2	cg19878194	0.077	0.51	0.011	Body
	GSE70303	GSE76351	STC2	cg10625081	0.29	0.51	0.34	Body
	GSE70303	GSE76351	STC2	cg24018799	0.077	0.51	0.018	Body
	GSE70303	GSE76351	STC2	cg01984743	0.49	0.51	1.2	Body
	GSE70303	GSE76351	STC2	cg19481287	0.36	0.51	0.62	Body
	GSE70303	GSE76351	STC2	ch.5.3304132F	0.1	0.51	0.095	Body
	GSE70303	GSE76351	STC2	cg15420720	0.48	0.51	1.3	Body
	GSE70303	GSE76351	STC2	cg26721877	-0.34	0.51	-0.67	TSS1500
	GSE70303	GSE76351	STC2	cg26605683	0.39	0.51	1.7	Body
	GSE70303	GSE76351	TAGLN3	cg03449660	0.13	-0.15	-0.074	Body
	GSE70303	GSE76351	TAGLN3	cg14098532	-0.007	-0.15	0.74	1stExon;TSS200;5'UTR
	GSE70303	GSE76351	TAGLN3	cg27327647	0.29	-0.15	-0.16	Body
	GSE70303	GSE76351	TAGLN3	cg25183613	-0.11	-0.15	0.39	TSS200;TSS1500
	GSE70303	GSE76351	TFAP2A	cg27283345	-0.22	-0.58	0.52	TSS1500
	GSE70303	GSE76351	TFAP2A	cg24902920	-0.44	-0.58	0.99	TSS1500
	GSE70303	GSE76351	TFAP2A	cg00405198	-0.16	-0.58	2	TSS200
	GSE70303	GSE76351	TFAP2A	cg18240331	-0.57	-0.58	0.86	TSS200
	GSE70303	GSE76351	TFAP2A	cg00906973	-0.45	-0.58	1	TSS200
	GSE70303	GSE76351	TFAP2A	cg02162880	-0.39	-0.58	1	TSS200
	GSE70303	GSE76351	TFAP2A	cg16226962	-0.2	-0.58	0.47	TSS1500
	GSE70303	GSE76351	TFAP2A	cg14909730	-0.098	-0.58	1.9	TSS200
	GSE70303	GSE76351	TFAP2A	cg01158822	-0.24	-0.58	0.91	1stExon
	GSE70303	GSE76351	TFAP2A	cg02622074	-0.1	-0.58	1.3	1stExon;5'UTR
	GSE70303	GSE76351	TFAP2A	cg15219145	-0.29	-0.58	1	1stExon;5'UTR
	GSE70303	GSE76351	TFAP2A	cg13298147	-0.35	-0.58	1.5	TSS1500
	GSE70303	GSE76351	TFAP2A	cg25739875	-0.31	-0.58	1.2	1stExon;5'UTR
	GSE70303	GSE76351	TFAP2A	cg12439899	-0.091	-0.58	0.69	1stExon;5'UTR
	GSE70303	GSE76351	TFAP2A	cg18732032	-0.077	-0.58	1.1	TSS200
	GSE70303	GSE76351	TFAP2A	cg14993900	-0.33	-0.58	0.44	TSS1500
	GSE70303	GSE76351	TFAP2A	cg09288780	-0.035	-0.58	0.11	TSS1500
	GSE70303	GSE76351	TFAP2A	cg17697633	-0.24	-0.58	2.6	TSS1500
	GSE70303	GSE76351	TFAP2A	cg25940847	-0.58	-0.58	0.11	1stExon;5'UTR
	GSE70303	GSE76351	TFAP2A	cg06880667	-0.37	-0.58	0.44	TSS1500
	GSE70303	GSE76351	TFAP2A	cg02397497	-0.23	-0.58	0.45	1stExon;5'UTR
	GSE70303	GSE76351	TFAP2A	cg15442419	0.41	-0.58	-0.47	Body
	GSE70303	GSE76351	TFAP2A	cg23535596	-0.056	-0.58	0.42	TSS1500
	GSE70303	GSE76351	TFAP2A	cg11079583	-0.13	-0.58	0.23	TSS1500
	GSE70303	GSE76351	TFAP2A	cg13373589	-0.1	-0.58	0.72	TSS1500
	GSE70303	GSE76351	TFAP2A	cg07492757	-0.17	-0.58	1.1	TSS1500
	GSE70303	GSE76351	TFAP2A	cg20777920	0.1	-0.58	-0.18	Body
	GSE70303	GSE76351	TFAP2A	cg11063729	-0.063	-0.58	0.55	TSS200
	GSE70303	GSE76351	TFAP2A	cg17557766	-0.64	-0.58	0.63	TSS1500
	GSE70303	GSE76351	TFAP2A	cg12377424	-0.29	-0.58	0.078	1stExon;5'UTR
	GSE70303	GSE76351	TMEM30B	cg01835384	0.16	-0.54	-0.52	Body
	GSE70303	GSE76351	TMEM30B	cg01084740	-0.5	-0.54	0.43	1stExon;5'UTR
	GSE70303	GSE76351	TMEM30B	cg01546243	-0.52	-0.54	0.95	1stExon;5'UTR
	GSE70303	GSE76351	TMEM30B	cg10749808	-0.57	-0.54	0.24	1stExon
	GSE70303	GSE76351	TMEM30B	cg15891218	-0.53	-0.54	0.37	1stExon;5'UTR
	GSE70303	GSE76351	TMEM30B	cg04373359	-0.2	-0.54	0.6	1stExon
	GSE70303	GSE76351	TMEM30B	cg10081469	-0.27	-0.54	0.65	1stExon;5'UTR
	GSE70303	GSE76351	TMEM30B	cg19705215	-0.32	-0.54	0.52	1stExon
	GSE70303	GSE76351	TRPM2	cg01224657	0.007	0.13	0.083	Body
	GSE70303	GSE76351	TRPM2	cg21231689	0.042	0.13	0.19	Body
	GSE70303	GSE76351	TRPM2	cg02892357	0.4	0.13	0.046	Body
	GSE70303	GSE76351	TRPM2	cg27146001	0.17	0.13	0.0047	Body
	GSE70303	GSE76351	TRPM2	cg19011752	-0.33	0.13	-0.11	TSS1500
	GSE70303	GSE76351	TRPM2	cg06342416	-0.27	0.13	-0.41	1stExon;5'UTR
	GSE70303	GSE76351	TRPM2	cg27328431	0.27	0.13	0.31	Body
	GSE70303	GSE76351	TRPM2	cg06356785	0.18	0.13	0.65	Body
	a The correlation (Rho) was calculated by Spearman`s rank test.
	b,c The ratio (*_LFC) was log2(fold change): fold change = Meantumor / Meannormal.
	d The promoter region included TSS1500, TSS200, 5'UTR and 1stExon.
