# Supplementary material for: Identification of DNA methylation patterns and biomarkers for clear-cell renal cell carcinoma by multi-omics data analysis
Source: PeerJ. 2020 Aug 3;8:e9654. doi: 10.7717/peerj.9654 (PMC7409785; doi:10.7717/peerj.9654)
Supplement: Supplemental Information 7 [file peerj-08-9654-s007.xlsx]

## Sheet: Description
Table S7 Function enrichment and biological network analysis using five CpG sites.

## Sheet: Table_S7
		Table S7 Function enrichment and biological network analysis using five CpG sites.
		Data Source	GO/KEGG Terms	P Value	Genes
		KEGG Pathway	Morphine addiction	0.0014	PDE1A,PDE8B
		KEGG Pathway	Purine metabolism	0.0027	PDE1A,PDE8B
		KEGG Pathway	Pentose phosphate pathway	0.02	PFKP
		KEGG Pathway	Galactose metabolism	0.02	PFKP
		KEGG Pathway	Fructose and mannose metabolism	0.021	PFKP
		KEGG Pathway	Ovarian steroidogenesis	0.031	ALOX5
		KEGG Pathway	Glutathione metabolism	0.036	NAT8
		KEGG Pathway	Arachidonic acid metabolism	0.04	ALOX5
		KEGG Pathway	Central carbon metabolism in cancer	0.042	PFKP
		KEGG Pathway	Cortisol synthesis and secretion	0.042	PDE8B
		KEGG Pathway	Fc epsilon RI signaling pathway	0.044	ALOX5
		KEGG Pathway	Glycolysis / Gluconeogenesis	0.045	PFKP
		KEGG Pathway	Renin secretion	0.045	PDE1A
		GO Biological Process	leukotriene production involved in inflammatory response	0.00029	ALOX5
		GO Biological Process	peptidyl-lysine N6-acetylation	0.00059	NAT8
		GO Biological Process	regulation of smooth muscle cell apoptotic process	0.00059	PDE1A
		GO Biological Process	cGMP catabolic process	0.0015	PDE1A
		GO Biological Process	lipoxin biosynthetic process	0.00145	ALOX5
		GO Biological Process	glucose catabolic process	0.0021	PFKP
		GO Biological Process	interleukin-18-mediated signaling pathway	0.0021	ALOX5
		GO Biological Process	cAMP catabolic process	0.0027	PDE8B
		GO Biological Process	fructose 1,6-bisphosphate metabolic process	0.0027	PFKP
		GO Biological Process	fructose 6-phosphate metabolic process	0.0027	PFKP
		GO Biological Process	regulation of smooth muscle cell proliferation	0.0027	PDE1A
		GO Biological Process	leukotriene biosynthetic process	0.003	ALOX5
		GO Biological Process	amyloid-beta metabolic process	0.0038	NAT8
		GO Biological Process	leukotriene metabolic process	0.0044	ALOX5
		GO Biological Process	lipoxygenase pathway	0.0047	ALOX5
		GO Biological Process	long-chain fatty acid biosynthetic process	0.0068	ALOX5
		GO Biological Process	canonical glycolysis	0.008	PFKP
		GO Biological Process	glutathione metabolic process	0.01	NAT8
		GO Biological Process	protein homotetramerization	0.027	PFKP
		GO Biological Process	cellular response to leukemia inhibitory factor	0.028	PFKP
		GO Biological Process	G protein-coupled receptor signaling pathway	0.037	PDE1A,PDE8B
