# Supplementary material for: Identification of DNA methylation patterns and biomarkers for clear-cell renal cell carcinoma by multi-omics data analysis
Source: PeerJ. 2020 Aug 3;8:e9654. doi: 10.7717/peerj.9654 (PMC7409785; doi:10.7717/peerj.9654)
Supplement: Supplemental Information 8 [file peerj-08-9654-s008.xlsx]

## Sheet: Description
	Table S8 Characters of 21 methylation markers and their coefficients in ccRCC

## Sheet: Table_S8
	Table S8 Characters of 21 methylation markers and their coefficients in ccRCC
	CpGs	Ref Gene	Coefficients	HR	CI	SE	z-value	p-value
	cg19516340	RRM2	-4	0.018	0.003-0.11	0.92	19	3.8e-06
	cg19535267	SHMT2	0.98	2.7	0.5-14	0.85	1.3	8.9e-06
	cg15287850	ST6GAL1	-0.13	0.88	0.19-4	0.78	0.03	1.2e-05
	cg25723459	ST3GAL4	-0.079	0.92	0.12-7.3	1.1	0.01	1.2e-05
	cg06462921	TBXAS1	2.4	12	1.8-73	0.94	6.8	1.3e-05
	cg22884714	CHEK2	2.2	9.4	1.4-65	0.99	5.1	0.00011
	cg19565262	NAT8	-0.011	0.99	0.17-5.8	0.9	0	0.00022
	cg14753094	HSD17B12	1	2.7	0.61-12	0.76	1.7	0.00035
	cg09203199	CES2	2.1	8	2.2-29	0.65	10	0.00038
	cg20622019	ADA	-2.5	0.084	0.02-0.36	0.73	11	0.00044
	cg16836311	MAN1C1	2.6	14	3.4-54	0.71	14	0.00054
	cg10805880	IL4I1	-2.7	0.07	0.002-2.4	1.8	2.2	0.00076
	cg10797850	ADSSL1	-2.9	0.056	0.0015-2.1	1.8	2.4	0.0014
	cg23659134	GSTO2	0.44	1.5	0.26-9.1	0.9	0.23	0.0024
	cg15357821	HOOK3	1.3	3.7	0.72-19	0.83	2.4	0.003
	cg01881182	ABAT	-0.47	0.63	0.18-2.2	0.64	0.52	0.0032
	cg16034168	ACOT7	0.54	1.7	0.7-4.3	0.46	1.4	0.0092
	cg03415545	ADH1C	-0.94	0.39	0.11-1.4	0.64	2.2	0.013
	cg15200711	LPCAT1	1.1	3	1.1-8.2	0.51	4.7	0.023
	cg09799983	CYP1B1	1.9	6.6	2.3-19	0.54	12	0.03
	cg11540204	CYP2J2	1.5	4.5	0.93-22	0.8	3.5	0.035
	HR: Hazard Ratio; CI: 95% confidence interval; SE: standard errors of coefficients; z-value: Wald z-statistic value
